# Supplementary material
Source: PubMed Central journal article supplement (PMC3697557)
Supplement: AEM.03821-12_zam999104478so1.pdf [file AEM.03821-12_zam999104478so1.pdf]

1 Supplemental material for:

2

3 **Mobile elements in a single-filament orange Guaymas Basin *Maribeggiatoa***  
4 **(*Beggiatoa*) sp. draft genome: Evidence for genetic exchange with cyanobacteria**

5

6 Running title: Mobile elements in orange Guaymas *Maribeggiatoa*

7

8 Barbara J. MacGregor<sup>1#</sup>, Jennifer F. Biddle<sup>2</sup>, and Andreas Teske<sup>1</sup>

9

10

11 <sup>1</sup>Department of Marine Sciences, University of North Carolina - Chapel Hill, Chapel Hill

12 NC 27599

13 <sup>2</sup>College of Earth, Ocean, and the Environment, University of Delaware, Lewes DE

14 19958

15

16 #To whom correspondence should be addressed: bmacgreg@unc.edu

17

18

19

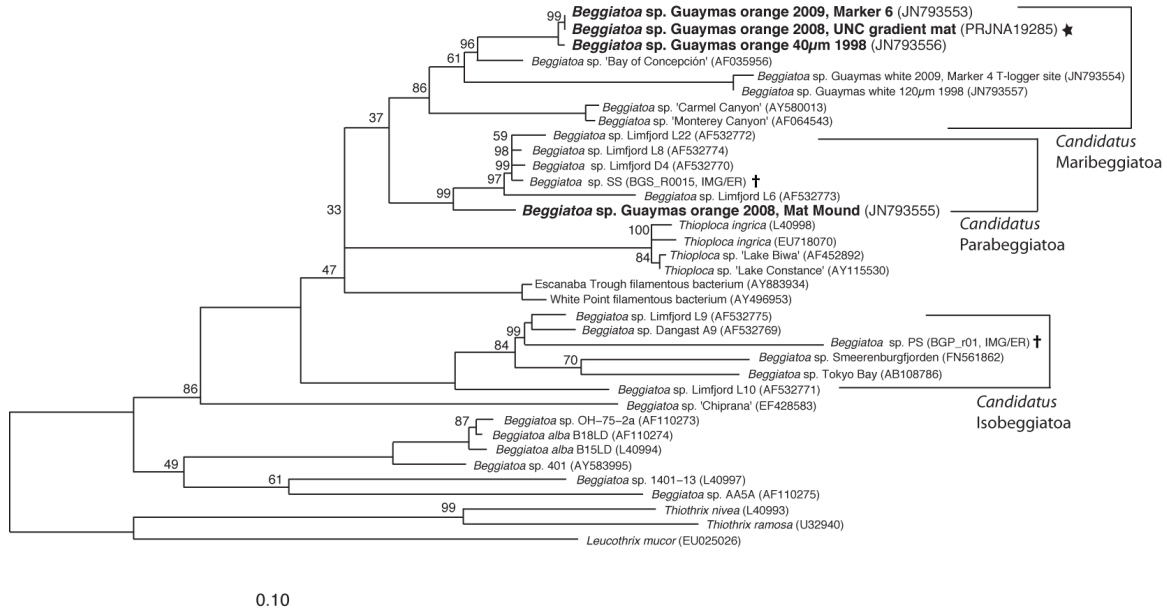

★ Genome sequence reported here  
 † *Beggiatoa* SS and PS sequences are incomplete;  
 added by maximum parsimony

20

21

22 **Figure S1. Phylogenetic tree of SSU rRNA genes from *Beggiatoaceae* and related**

23 **species.** Sequences obtained from orange Guaymas Basin filaments are highlighted, and

24 collection sites indicated where known. The candidate species groupings are those

25 proposed by Salman *et al.* (1), and the tree is adapted from McKay *et al.* (2). It was

26 constructed using ARB's (3) neighbor-joining function with a Jukes-Cantor (4) distance

27 correction, with two short sequences ("*Beggiatoa*" PS and SS, referred to in the text as

28 BgP and BgS) added by maximum parsimony. The newly proposed species

29 "*Allobeggiatoa*" (5), comprising narrow filaments from hypersaline environments, is not

30 included here.

31

32

33

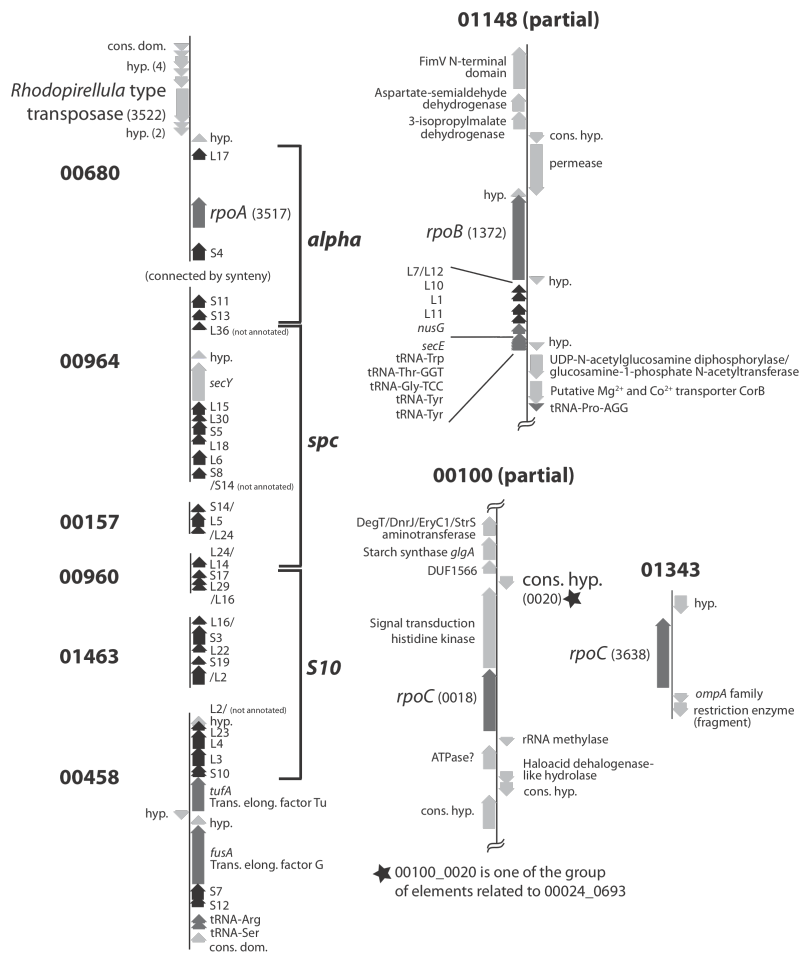

34

35 **Figure S2. Organization of selected ribosomal protein and DNA-directed RNA polymerase**

36 **genes.** Contig numbers are in large bold type, and ORF numbers (where given) are in

37 parentheses. Putative ribosomal protein genes are in black, RNA polymerase and other genes

38 discussed in the text are in dark gray, and remaining ORFs are in light gray. The contigs that

39 could be assembled are shown in order, with the common bacterial ribosomal protein operons

40 bracketed. “hyp.”, hypothetical protein; “cons. hyp.”, conserved hypothetical protein; “cons.

41 domain”, conserved domain protein.

42

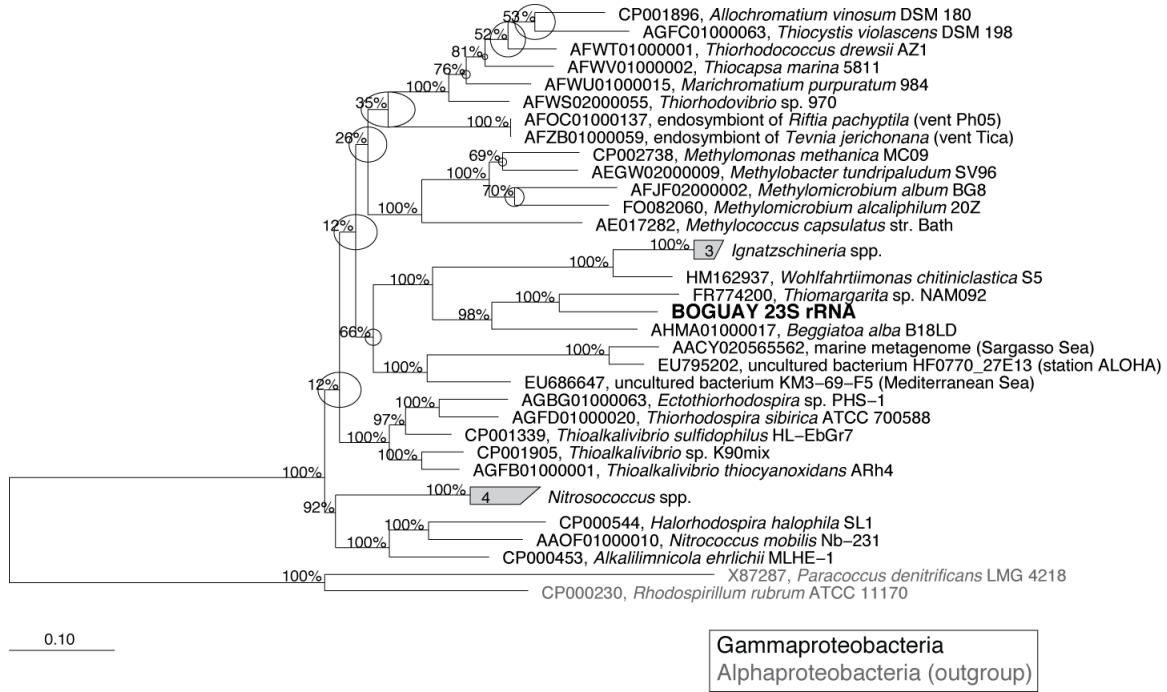

43

44

45 **Figure S3. Maximum-likelihood phylogeny of orange Guaymas *Maribeggiatoa* 23S rRNA.**

46 Closest relatives of the BOGUAY sequence (with and without inserts) were identified by  
 47 BLASTN searches of GenBank and IMG/ER, and aligned by the ARB (3) autoaligner with  
 48 manual refinement. Maximum-likelihood phylogenies were inferred in ARB with RAXML rapid  
 49 bootstrapping (6), using the GTRMIX nucleotide substitution model and 1000 bootstraps.

50 Numbers represent bootstrap values for each node and circles indicate uncertain branchpoints.

51 Most of the sequences shown do not contain intervening sequences, but filters to exclude these  
 52 regions had little effect on tree topology (not shown). Two alphaproteobacterial sequences were

53 used to root the tree. The scale bar represents base changes per position.

54

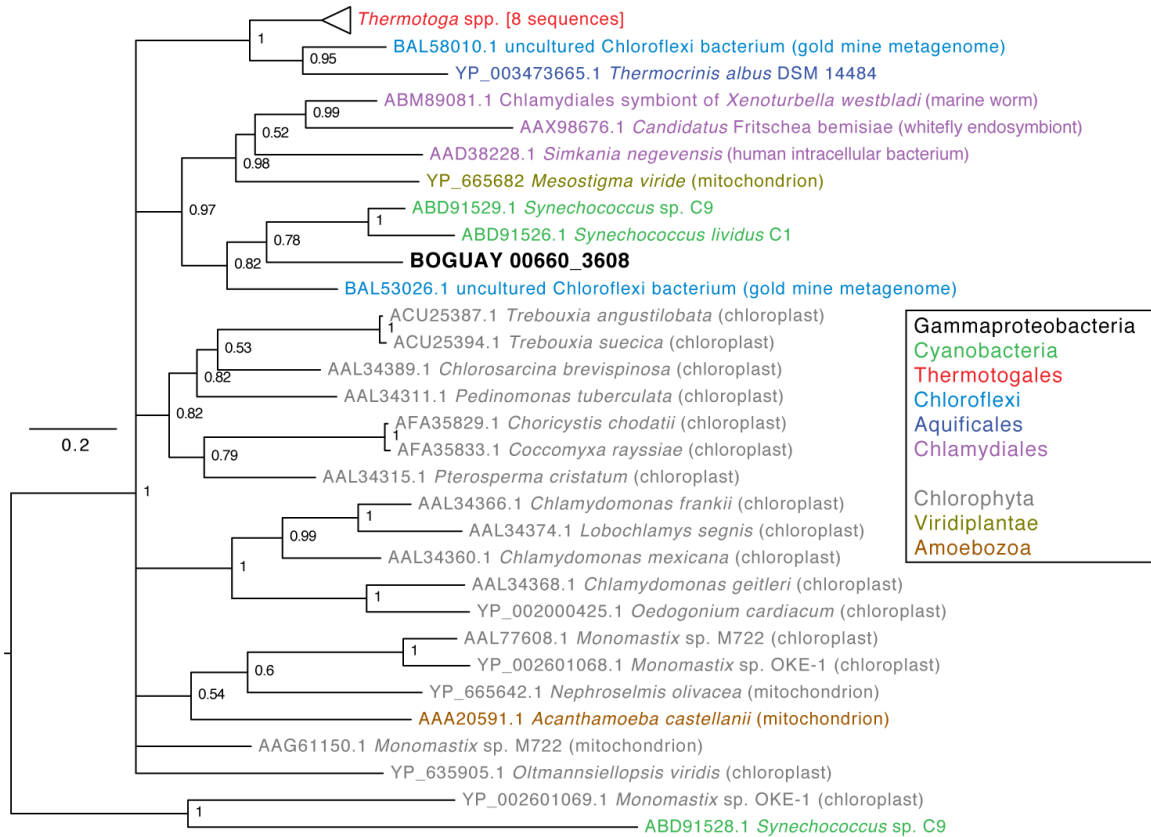

55  
56  
57  
58  
59  
60  
61  
62  
63  
64  
65  
66  
67  
68  
69

**Figure S4. Phylogeny of putative homing endonucleases encoded within 23S rRNA genes by Bayesian inference.** Relatives of BOGUAY 0660\_3608 were identified by BLASTX searches of the GenBank nr and JCVI IMG/ER databases (August 2012). All sequences in the clades most similar to the BOGUAY sequence were included in the tree shown here. Sequences were aligned in MEGA5 (7) with MUSCLE (8), and phylogenetic analysis was carried out with MrBayes 3.2 (9) (two runs of four chains each, 2.5 million generations) with the gamma rate heterogeneity model (10). The temperature was dropped from 0.1 to 0.05 to increase the chain swap acceptance rate. A mixed prior amino acid substitution model was used and the cpREV model (11) had a posterior probability of 0.998, likely driven by the preponderance of chloroplast sequences. The final statistics suggested that the two runs had converged (not shown). The scale bar represents amino acid changes per position.

Catalytic Group II Intron candidates

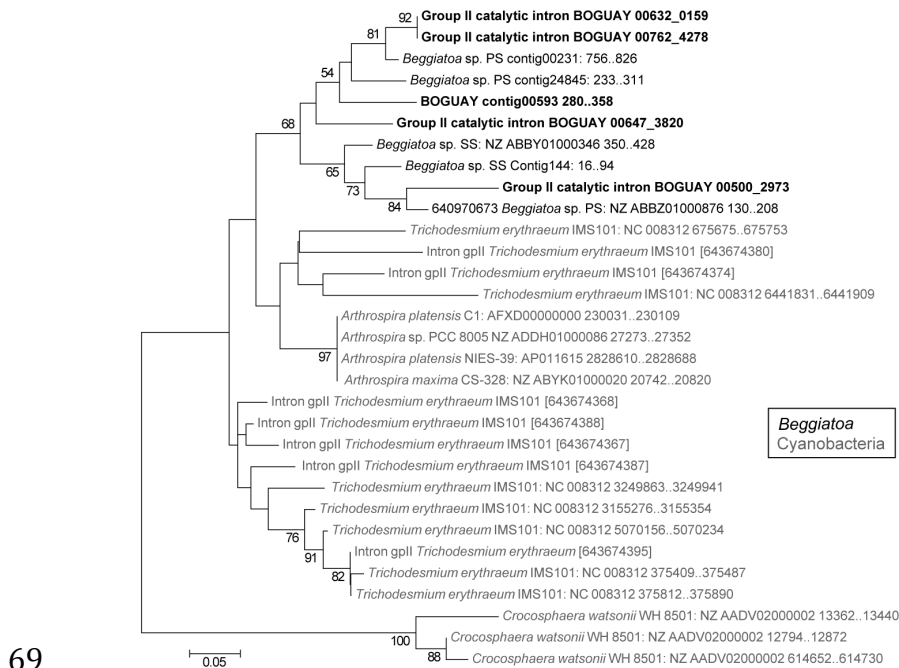

69

70

71 **Figure S5. Inferred phylogeny of putative BOGUAY Group II catalytic introns and related**

72 **sequences by neighbor joining.** Four sequences annotated as BOGUAY Group II introns were

73 used for BLASTN searches of the IMG/ER database (cutoff E value 9e-06, cutoff score 58 bits).

74 For sequences not previously annotated (the majority), genome positions are indicated. Three

75 *Crocosphaera watsonii* sequences were used to root the tree. Evolutionary analyses were

76 conducted in MEGA5 (7), with sequences aligned by MUSCLE (8). Evolutionary histories were

77 inferred by neighbor joining (12) with 500 bootstrap replicates (13). Branches corresponding to

78 partitions reproduced in less than 50% of bootstrap replicates are collapsed. The percentage of

79 replicate trees in which the associated taxa clustered together in the bootstrap test are shown next

80 to the branches for values  $\geq 50\%$ . Evolutionary distances were computed by the Poisson

81 correction method (14) and are in units of amino acid substitutions per site. All ambiguous

82 positions were removed for each sequence pair. Evolutionary distances are in units of base

83 substitutions per site. The analysis involved 31 nucleotide sequences. All ambiguous positions

84 were removed for each sequence pair. There were a total of 102 positions in the final dataset.

## A) BOGUAY GyrB intein and related sequences

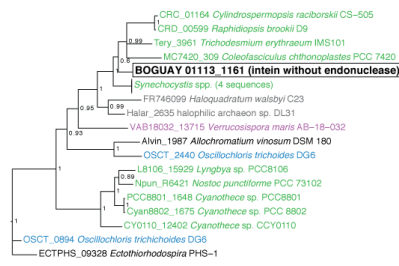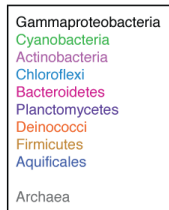

## B) BOGUAY DnaE intein and related sequences

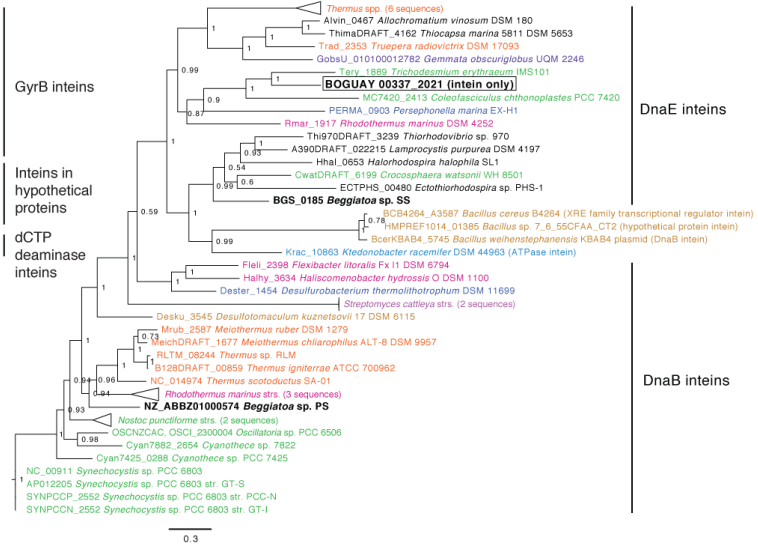

86

87

88 **Figure S6. Phylogeny of the putative BOGUAY GyrB and DnaE inteins by Bayesian**89 **inference.** Relatives of the BOGUAY sequences (highlighted by boxes) were identified by

90 BLASTX searches of the GenBank nr and JCVI IMG/ER databases. Sequences were aligned in

91 MEGA5 (7) using MUSCLE (8). Phylogenetic analysis was carried out with MrBayes 3.2 (9).

92 Two runs of four chains each were carried out for both datasets. The scale bars represent amino

93 acid changes per position. **A)** The analysis was run for 350,000 generations, and final statistics  
94 indicated convergence (not shown). The prior amino acid substitution model was mixed, and95 BLOSUM 62 (15) had a posterior probability of 1.000. **B)** The analysis was run for 500,000

96 generations, and final statistics indicated convergence (not shown). The prior amino acid

97 substitution model was mixed, and the WAG model (16) had a posterior probability of 1.000.

98

99

**A) BOGUAY GyrB extein and related sequences**

**B) BOGUAY DnaE extein and related sequences**

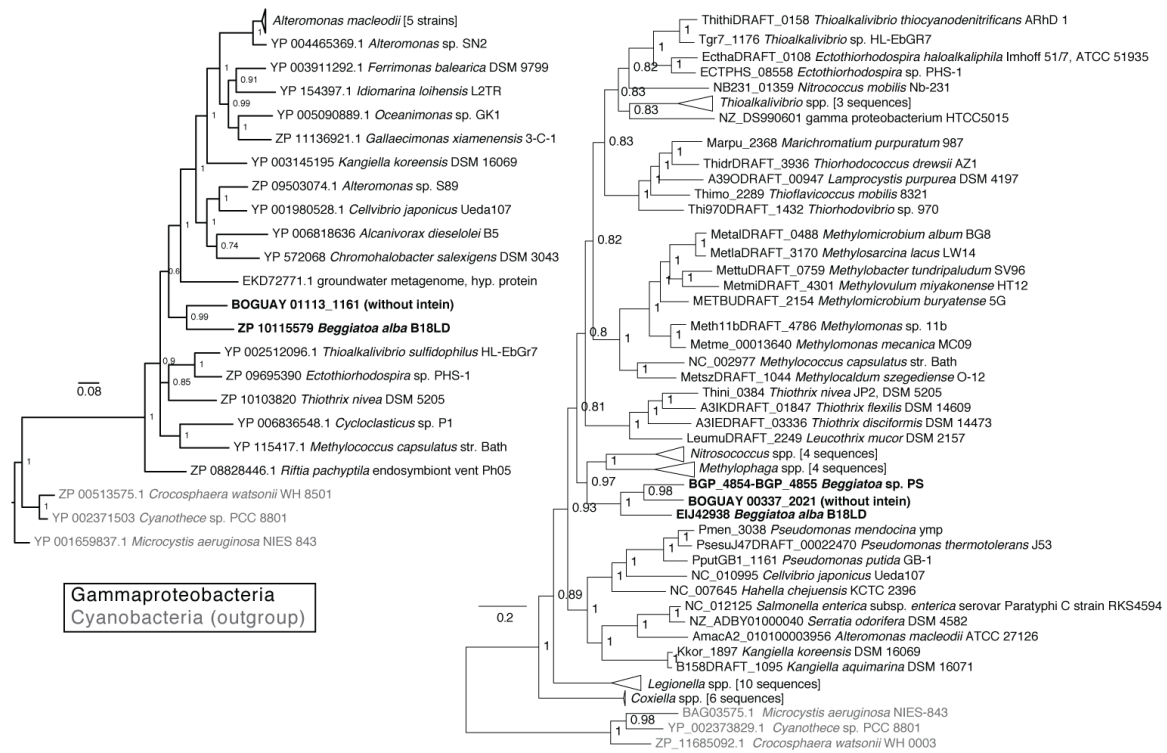

99

100

101

**Figure S7. Phylogeny of the putative BOGUAY GyrB and DnaE exteins by Bayesian**

102

**inference.** Relatives of the BOGUAY 01113\_1161 and 00337\_2021 inferred extein amino acid

103

sequences were identified by BLASTX searches of the GenBank nr and JCVI IMG/ER databases.

104

*Beggiatoaceae* are highlighted in boldface. Sequences are identified by GenBank accession

105

numbers or IMG/ER locus tags and phylogenetic analysis was carried out with MrBayes 3.2 (9).

106

Three cyanobacterial sequences were used to root the trees. For both genes, the prior amino acid

107

model was mixed and the WAG amino acid substitution model (16) had a posterior probability of

108

1.000. The final statistics indicated convergence was reached between the two runs in both cases

109

(not shown). The scale bars represent amino acid changes per position. **A)** Sequence alignments

110

were done in COBALT (17). The analysis was run for 400,000 generations (2 runs of 4 chains

111

each). **B)** Sequence alignments were done in MEGA5 (7) using MUSCLE (8). MrBayes was run

112

for 4 million generations (2 runs of 4 chains each). The temperature was dropped from 0.1 to 0.03

113

to increase the chain swap acceptance rate.



**(A) Putative HicA family toxins related to BOGUAY 00011\_3637**

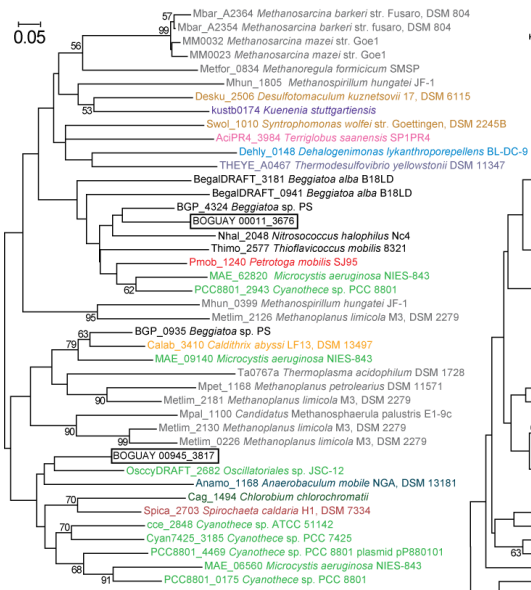

**(B) Putative HigA family antitoxins related to BOGUAY 00106\_0227**

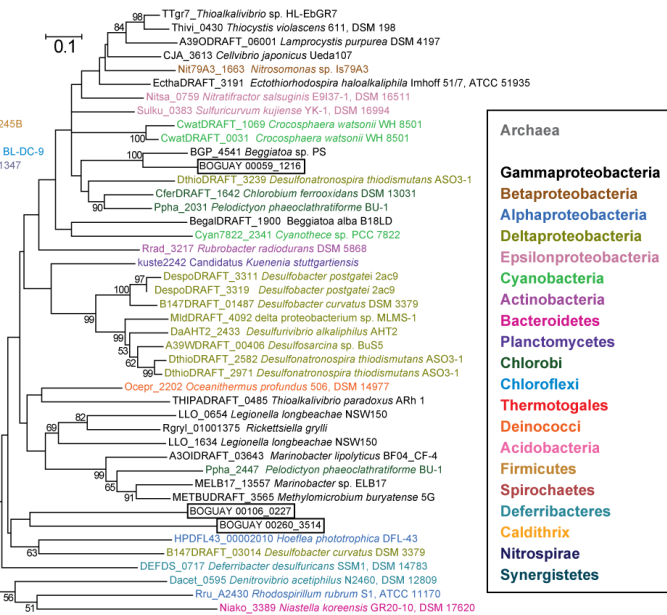

|                       |
|-----------------------|
| Archaea               |
| Gammaproteobacteria   |
| Betaproteobacteria    |
| Alphaproteobacteria   |
| Deltaproteobacteria   |
| Epsilonproteobacteria |
| Cyanobacteria         |
| Actinobacteria        |
| Bacteroidetes         |
| Planctomycetes        |
| Chlorobi              |
| Chloroflexi           |
| Thermotogales         |
| Deinococci            |
| Acidobacteria         |
| Firmicutes            |
| Spirochaetes          |
| Deferribacteres       |
| Caldithrix            |
| Nitrospirae           |
| Synergistetes         |

114

115

116 **Figure S8. Examples of inferred toxin and antitoxin phylogenies.** Evolutionary analyses were

117 conducted in MEGA5 (7), with sequences aligned by MUSCLE (8). Evolutionary histories were

118 inferred by neighbor joining (12) with 500 bootstrap replicates (13). Branches corresponding to

119 partitions reproduced in less than 50% of bootstrap replicates are collapsed. The percentage of

120 replicate trees in which the associated taxa clustered together in the bootstrap test are shown next

121 to the branches for values  $\geq 50\%$ . Evolutionary distances were computed by the Poisson

122 correction method (14) and are in units of amino acid substitutions per site. All ambiguous

123 positions were removed for each sequence pair. BOGUAY sequences are highlighted by boxes.

124 **A)** For HicA, the analysis involved 42 amino acid sequences, with 127 positions in the final

125 dataset. **B)** For HigA, the analysis involved 44 amino acid sequences, with 167 positions in the

126 final dataset.

127 **Table S1. Predicted ribosomal protein genes.**

| Ribosomal protein <sup>a</sup> | Gene        | Contig_ORF                      | <i>E. coli</i> operon (18) | Notes                                                                                                                                                                    |
|--------------------------------|-------------|---------------------------------|----------------------------|--------------------------------------------------------------------------------------------------------------------------------------------------------------------------|
| S1                             | <i>rpsA</i> | 00726_1454                      |                            | Separated from other ribosomal protein genes, in conserved neighborhood (includes <i>ihfB</i> , <i>cmk</i> , <i>aroA</i> )                                               |
| S2                             | <i>rpsB</i> | 01035_2226                      |                            | Separated from other ribosomal protein genes, in conserved neighborhood (includes <i>tsf</i> , <i>pyrH</i> , <i>frr</i> )                                                |
| S3                             | <i>rpsC</i> | 01463_4525                      | S10                        |                                                                                                                                                                          |
| S4                             | <i>rpsD</i> | 00680_3516                      | alpha                      | By synteny, may be downstream of S11                                                                                                                                     |
| S5                             | <i>rpsE</i> | 00964_3699                      | <i>spc</i>                 |                                                                                                                                                                          |
| S6                             | <i>rpsF</i> | 00936_0911                      | S6                         | S6, S18, and L9 together in somewhat conserved cluster with <i>dnaB</i>                                                                                                  |
| S7                             | <i>rpsG</i> | 00458_3456                      | <i>str</i>                 |                                                                                                                                                                          |
| S8                             | <i>rpsH</i> | 00964_3696                      | <i>spc</i>                 |                                                                                                                                                                          |
| S9                             | <i>rpsI</i> | 01192_0185                      |                            | S9 and L13 together, which is seen in other bacteria, but surrounding genes seem unusual; S21 separate, in conserved neighborhood (includes <i>dnaG</i> , <i>rpoD</i> )  |
| S10                            | <i>rpsJ</i> | 00458_3451, 00458_3450          | S10                        | Run of 7 T's in sequence where closest matches have 3 probable sequencing errors, accounting for split gene                                                              |
| S11                            | <i>rpsK</i> | 00964_3705                      | alpha                      | Probably follows S4, by synteny                                                                                                                                          |
| S12                            | <i>rpsL</i> | 00458_3457                      | <i>str</i>                 |                                                                                                                                                                          |
| S13                            | <i>rpsM</i> | 00964_3704                      | alpha                      |                                                                                                                                                                          |
| S14                            | <i>rpsN</i> | 00157_4992 (upstream portion)   | <i>spc</i>                 | Downstream portion found upstream of S8 on contig 00964                                                                                                                  |
| S15                            | <i>rpsO</i> | 00969_3087                      |                            | Separate from other ribosomal protein genes, in conserved cluster (includes <i>truB</i> , <i>pnp</i> )                                                                   |
| S16                            | <i>rpsP</i> | 01318_2101                      |                            | S16 and L19 together in short conserved cluster (includes <i>trmD</i> , <i>rimM</i> )                                                                                    |
| S17                            | <i>rpsQ</i> | 00960_4877                      | S10                        |                                                                                                                                                                          |
| S18                            | <i>rpsR</i> | 00936_0910                      | S6                         | S6, S18, and L9 together in somewhat conserved cluster with <i>dnaB</i>                                                                                                  |
| S19                            | <i>rpsS</i> | 01463_4527                      | S10                        |                                                                                                                                                                          |
| S20                            | <i>rpsT</i> | 00665_1281                      |                            | Separate from other ribosomal proteins, which seems usual; no obvious conserved neighborhood                                                                             |
| S21                            | <i>rpsU</i> | 01192_0212                      |                            | S9 and L13 together, which is seen in other bacteria, but surrounding genes seem unusual; S21 separate, in conserved neighborhood (includes <i>dnaG</i> , <i>rpoD</i> )  |
| L1                             | <i>rplA</i> | 01148_1368                      | L11                        |                                                                                                                                                                          |
| L2                             | <i>rplB</i> | 01463_4528 (downstream portion) | S10                        | Upstream portion found on contig 00458, including 00458_3446 and the DNA from there to the end of the contig                                                             |
| L3                             | <i>rplC</i> | 00458_3449                      | S10                        |                                                                                                                                                                          |
| L4                             | <i>rplD</i> | 00458_3448                      | S10                        |                                                                                                                                                                          |
| L5                             | <i>rplE</i> | 00157_4991                      | <i>spc</i>                 |                                                                                                                                                                          |
| L6                             | <i>rplF</i> | 00964_3697                      | <i>spc</i>                 |                                                                                                                                                                          |
| L7/L12                         | <i>rplL</i> | 01148_1370                      | L10                        |                                                                                                                                                                          |
| L9                             | <i>rplI</i> | 00936_0908                      | S6                         | S6, S18, and L9 together in somewhat conserved cluster with <i>dnaB</i>                                                                                                  |
| L10                            | <i>rplJ</i> | 01148_1369                      | L10                        |                                                                                                                                                                          |
| L11                            | <i>rplK</i> | 01148_1367                      | L11                        |                                                                                                                                                                          |
| L13                            | <i>rplM</i> | 01192_0186                      |                            | S9 and L13 together, which is seen in other bacteria, but surrounding genes seem unusual; S21 separate, in conserved neighborhood (includes <i>dnaG</i> , <i>rpoD</i> ). |
| L14                            | <i>rplN</i> | 00960_4876                      | <i>spc</i>                 |                                                                                                                                                                          |

|                |             |                                                      |            |                                                                                                                                                                        |
|----------------|-------------|------------------------------------------------------|------------|------------------------------------------------------------------------------------------------------------------------------------------------------------------------|
| L15            | <i>rplO</i> | 00964_3701                                           | <i>spc</i> |                                                                                                                                                                        |
| L16            | <i>rplP</i> | 01463_4524 (upstream);<br>00960_4879<br>(downstream) | S10        |                                                                                                                                                                        |
| L17            | <i>rplQ</i> | 00680_3518                                           | alpha      |                                                                                                                                                                        |
| L18            | <i>rplR</i> | 00964_3698                                           | <i>spc</i> |                                                                                                                                                                        |
| L19            | <i>rplS</i> | 01318_2098                                           |            | S16 and L19 together in short conserved cluster (includes <i>trmD</i> , <i>rimM</i> )                                                                                  |
| L20            | <i>rplT</i> | 00883_3299                                           |            | L20 and L35 together in conserved cluster (includes <i>thrS</i> and <i>infC</i> )                                                                                      |
| L21            | <i>rplU</i> | 00832_2867                                           |            | L21 and L27 found with <i>cgtA</i> , which seems somewhat conserved                                                                                                    |
| L22            | <i>rplV</i> | 01463_4526                                           | S10        |                                                                                                                                                                        |
| L23            | <i>rplW</i> | 00458_3447                                           | S10        |                                                                                                                                                                        |
| L24            | <i>rplX</i> | 00157_4990<br>(downstream portion)                   | <i>spc</i> | Upstream portion found on contig 00960, downstream of <i>rplN</i>                                                                                                      |
| L25 (CTC form) |             | 00369_1647                                           |            | Where studied, this form of L25 is produced under stress conditions (19). Found in conserved neighborhood (with <i>ispE</i> , tRNA-Gln-TTG, <i>prs</i> , <i>pth</i> ). |
| L27            | <i>rpmA</i> | 00832_2868                                           |            | L21 and L27 found with <i>cgtA</i> , which seems somewhat conserved                                                                                                    |
| L28            | <i>rpmB</i> | 00660_3605                                           |            | Found immediately downstream of 5S rRNA gene, which does not seem a conserved position. Most orthologs found upstream of L33, but this one is not.                     |
| L29            | <i>rpmC</i> | 00960_4878                                           | S10        |                                                                                                                                                                        |
| L30            | <i>rpmD</i> | 00964_3700                                           | <i>spc</i> |                                                                                                                                                                        |
| L31            | <i>rpmE</i> | 01153_1097                                           |            | Neighborhood not obviously conserved; just upstream of heme export protein genes <i>ccmB</i> and <i>ccmC</i> .                                                         |
| L32            | <i>rpmF</i> | 00396_2184                                           |            | Found in conserved neighborhood, just upstream of some phospholipid synthesis genes (includes <i>plsX</i> , <i>fabH</i> , <i>fabD</i> )                                |
| L33            | <i>rpmG</i> | 00163_0997                                           |            | Just upstream of <i>pgk</i> , position does not seem conserved                                                                                                         |
| L34            | <i>rpmH</i> | 00696_0322                                           | L34        | Found in somewhat conserved cluster (includes <i>rnpA</i> and <i>yidC</i> )                                                                                            |
| L35            | <i>rpmI</i> | 00883_3300                                           |            | L20 and L35 together in conserved cluster (includes <i>thrS</i> and <i>infC</i> )                                                                                      |
| L36            | <i>rpmJ</i> | Contig 00964 (positions<br>5778-5891)                | <i>spc</i> |                                                                                                                                                                        |

128

129 <sup>a</sup> Historically, “L26” was found to be identical to L20 (20), and “L8” was shown to be a

130 complex of the identical proteins L7 and L12 with L10 (21).

131

131 **Table S2. Predicted tRNA and tRNA synthetase genes.** Annotation by JCVI, IMG/ER,  
 132 and RAST unless otherwise indicated.

| tRNA                                                                                              | Contig_ORF                                                                                                        | Cognate tRNA synthetase (contig_ORF)                                                                                                          | tRNAs spared by bacterial wobble-base rules (22) |
|---------------------------------------------------------------------------------------------------|-------------------------------------------------------------------------------------------------------------------|-----------------------------------------------------------------------------------------------------------------------------------------------|--------------------------------------------------|
| tRNA-Ala-GGC<br>tRNA-Ala-TGC<br>tRNA-Ala-CGC                                                      | 00059_1200<br>00660_3610<br>00170_4111                                                                            | alanyl-tRNA synthetase (00632_0118)                                                                                                           | tRNA-Ala-AGC                                     |
| tRNA-Arg-ACG<br>tRNA-Arg-CCG<br>tRNA-Arg-CCT<br><br>tRNA-Arg-TCT <sup>4</sup>                     | 00458_3458<br>00550_5173<br>00170_4110<br><br>00822<br>(34896-<br>34858...3458<br>8-34541)                        | arginyl-tRNA synthetase (00429_4146)                                                                                                          | tRNA-Arg-TCG<br>tRNA-Arg-GCG                     |
| tRNA-Asn-GTT                                                                                      | 00696_0310                                                                                                        | aspartyl/glutamyl-tRNA amidotransferase subunit A (00150_0829, 0828) <sup>3</sup> ; subunit B (00338_4326); subunit C (00150_0830)            | tRNA-Asn-ATT                                     |
| tRNA-Asp-GTC                                                                                      | 00214_3254                                                                                                        | aspartyl-tRNA synthetase (00106_0256)                                                                                                         | tRNA-Asp-ATC                                     |
| tRNA-Cys-GCA                                                                                      | 00394_1822                                                                                                        | cysteinyl-tRNA synthetase (00362_1727)                                                                                                        | tRNA-Cys-ACA                                     |
| tRNA-Gln-CTG<br>tRNA-Gln-TTG                                                                      | 01192_0184<br>00369_1645                                                                                          | glutamyl-tRNA synthetase (00824_3103)                                                                                                         |                                                  |
| tRNA-Glu-CTC<br>tRNA-Glu-TTC                                                                      | 00938_0746<br>00059_1201                                                                                          | glutamyl-tRNA synthetase (00822_0376)                                                                                                         |                                                  |
| tRNA-Gly-CCC<br>tRNA-Gly-GCC<br>tRNA-Gly-TCC                                                      | 00397_1685<br>00394_1823<br>01148_1362                                                                            | glycyl-tRNA synthetase, alpha subunit (01308_0438); beta subunit (01308_0437)                                                                 | tRNA-Gly-ACC                                     |
| tRNA-His-GTG                                                                                      | 00822_0367                                                                                                        | histidyl-tRNA synthetase (00726_1463)                                                                                                         | tRNA-His-ATG                                     |
| tRNA-Ile-GAT<br>tRNA-Ile-TAT                                                                      | 00660_3611<br>00369_1667 <sup>1</sup>                                                                             | isoleucine-tRNA synthetase (00043_2361)<br>Specificity changed from Met (CAT) to Ile (TAT) by tRNA(Ile)-lysidine synthase (BOGUAY 00794_2073) | tRNA-Ile-AAT                                     |
| tRNA-Leu-CAA<br>tRNA-Leu-CAG<br>tRNA-Leu-GAG<br><br>tRNA-Leu-TAG<br><br>tRNA-Leu-TAA <sup>4</sup> | 00153_2340<br>00059_1208<br>00149_4873<br>01068_5251<br>00214_3263<br><br>00394 (7562 -<br>7524...7223 -<br>7175) | leucyl-tRNA synthetase (00356_1908)                                                                                                           | tRNA-Leu-AAG                                     |
| tRNA-Lys-CTT<br>tRNA-Lys-TTT                                                                      | 00214_3264<br>00478_0883                                                                                          | lysyl-tRNA synthetase (01090_3690)                                                                                                            |                                                  |
| tRNA-eMet-CAT<br>tRNA-iMet-CAT                                                                    | 01341_2394<br>01192_0203 <sup>2</sup>                                                                             | methionyl-tRNA synthetase (00356_1919)                                                                                                        |                                                  |

133

|                                                              |                                                      |                                                                                                        |                               |
|--------------------------------------------------------------|------------------------------------------------------|--------------------------------------------------------------------------------------------------------|-------------------------------|
| tRNA-Phe-GAA                                                 | 00241_1022                                           | phenylalanyl-tRNA synthetase, alpha subunit (00726_1461); beta subunit (00794_2075, 2076) <sup>3</sup> | tRNA-Phe-AAA                  |
| tRNA-Pro-CGG<br>tRNA-Pro-GGG<br>tRNA-Pro-TGG                 | 01232_0410<br>01148_1356<br>00822_0369               | prolyl-tRNA synthetase (00194_2279)                                                                    | tRNA-Pro-AGG                  |
| tRNA-Ser-CGA<br>tRNA-Ser-GCT<br>tRNA-Ser-GGA<br>tRNA-Ser-TGA | 00031_3796<br>00458_3459<br>00967_1430<br>00906_2616 | seryl-tRNA synthetase (00226_3292)                                                                     | tRNA-Ser-ACT,<br>tRNA-Ser-AGA |
| tRNA-Thr-CGT<br>tRNA-Thr-GGT<br>tRNA-Thr-TGT                 | 00901_3209<br>01148_1363<br>00513_4070               | threonyl-tRNA synthetase (00883_3302)                                                                  | tRNA-Thr-AGT                  |
| tRNA-Trp-CCA                                                 | 01148_1364                                           | tryptophanyl-tRNA synthetase (00780_1607)                                                              |                               |
| tRNA-Tyr-GTA                                                 | 01148_1359<br>01148_1361                             | tyrosyl-tRNA synthetase (01113_1172)                                                                   | tRNA-Tyr-ATA                  |
| tRNA-Val-CAC<br>tRNA-Val-GAC<br>tRNA-Val-TAC                 | 00285_1246<br>00883_3303<br>00214_3255<br>00214_3256 | valyl-tRNA synthetase (00696_0295)                                                                     | tRNA-Val-AAC                  |

134

<sup>1</sup> Predicted by TFAM (23).

135

136

<sup>2</sup> Predicted by TFAM (23) and tRNdb (24).

137

138

<sup>3</sup> Phenylalanyl-tRNA synthetase and aspartyl/glutamyl-tRNA amidotransferase subunit A each span two predicted ORFs, possibly due to amplification or sequencing errors.

139

140

141

<sup>4</sup> tRNA-Arg-TCT and tRNA-Leu-TAA genes contain intervening sequences, which are possibly group I introns. tRNA domains are annotated below according to the Transfer RNA Database (tRNadb (24)). tRNA sequences are underlined. Orange, acceptor stem; green, D-stem; blue, anticodon stem; red, anticodon; pink, TΨC-stem. Note that tRNA-Arg-TCT ends in CAA rather than CCA.

142

143

144

145

146

**tRNA-Arg-TCT** (reverse complement of IMG/ER 2502791056 *Beggiatoa* sp. "Orange Guaymas" :

147

148

BOGUA\_contig00822 34541..34896)

149

GCGCTCGTAGCTCATCTGGATAGGCATCGGCCTTCTTTTTTGTGTTAAGCAAATTGGACCCATAACGGAAAACAGGA

150

ACTGTTATGGTGGATGGTGCTATATCGGTGAAACCTGTCAAATGGCAATACCGAGGAAACCGAGGGGATGGTGAAGGG

151

CAAATCTTTATAAAAATTTTGCAGTAACCATTCGGTCAACTTAATTAAGTTGCCGGGATCCGTAGAGGCCATACGCAC

152

CATGCCTGAGATGGCAAAGAGATGGTCCAGACCGCAAACATTAATTTGGTAGCGAAAGCTATAGTGGTATGAAGCCGAG

153

GGTAGCAGGTTTCGAGTCTTGCCGAGCGCAAATTTTCAA

154

155

**tRNA-Leu-TAA** (reverse complement of IMG/ER 2502790796 *Beggiatoa* sp. "Orange Guaymas" :

156

BOGUA\_contig00394 7175..7562)

157

GCCCGGTTGGCGAAATTTGGTAGACGCAAGGGACTTAAACTAATTTGAGCACCTAAGCGGAAATCTTTAGGTGAATGGA

158

GTCTAATTCGGTGAACCTTTAACTGGCAACGTCGAGCTAAGCTTAAGCTTATGTCAAGGATATGGGCAAAAATTTT

159

CCCCCTCCCCTTATCTTCTTGGTAGAGCATCTGAAAGTGTAGAGGCCATACGGCTCCTGCCTGACTAAATCCCCTATC

160

CCCATTTGGGTTAGAGAAAATTTAAAGGCAAAGAAATGGTCCAGACCACAAACATATTTGATTAATATAGTATGGCAG

161

TGAAAACCTGTAGTTGGTAAGAAATCCTTCGGTGGAAACACCGTACCGGTTTCGAGTCCGGTCCCGGGTACCA

162 **Table S3. Putative group II catalytic introns and adjacent ORFs.**

| Contig | ORF            | Assignment                           | Position on contig (strand) | Closest BLASTX or BLASTN matches                                                                                                                                                            | Comments                                |
|--------|----------------|--------------------------------------|-----------------------------|---------------------------------------------------------------------------------------------------------------------------------------------------------------------------------------------|-----------------------------------------|
| 00500  | (not assigned) | Possible transposase                 | ca. 6098-6340 (+)           | First BLASTX/nr hit is putative transposase from gamma proteobacterium IMCC1989 (EGG94688.1)                                                                                                | Identified by BLASTX/nr in GenBank      |
|        | 2969           | KilA-N domain (DNA-binding) protein? | 6758-7240 (+)               | First BLASTX/nr hit is hypothetical protein ThvES_00001210 [ <i>Thiovulum</i> sp. ES (EJF07782.1)]                                                                                          |                                         |
|        | 2970           | Transposase, IS4-like                | 7525-7941 (+)               | First BLASTX/nr hit is BgP; second is transposase IS4 family protein [ <i>Chlorobium limicola</i> DSM 245 (ACD89665.1)]                                                                     |                                         |
|        | 2971           | Retron-type reverse transcriptase    | 8161-9495 (+)               | First BLASTX/nr hit is BgP; second is RNA-directed DNA polymerase [ <i>Moorea producta</i> 3L (EGJ28487.1)]                                                                                 |                                         |
|        | 2972           | HNH endonuclease domain protein      | 9511-9990 (+)               | First BLASTX/nr hit is PS; second is hypothetical protein L8106_29020 [ <i>Lyngbya</i> sp. PCC 8106 (EAW34308.1)]                                                                           |                                         |
|        | 2973           | <b>Group II catalytic intron</b>     | 10054-10133 (+)             | Blastn/IMG gives one BgP and one BgS match; first BLASTN/nr hit is from <i>Trichodesmium erythraeum</i> IMS101, complete genome (CP000393.1)                                                |                                         |
|        | 2974           | Transposase                          | 10169-10684 (+)             | First BLASTX/nr hit is BgS; second is transposase, IS605 OrfB family [ <i>Thiorhodospira sibirica</i> ATCC 700588 (EGZ44075.1)]                                                             |                                         |
| 00647  | 3820           | <b>Group II catalytic intron</b>     | 325-403 (+)                 | First BLASTN/IMG match is to BgP second is to <i>Trichodesmium erythraeum</i> IMS101, complete genome (CP000393.1)                                                                          | First ORF on contig, coming in from end |
|        | 3821           | KilA-N domain (DNA-binding)          | 432-1097 (+)                | First BLASTX/nr match is KilA-N domain-containing protein, partial [ <i>Thiovulum</i> sp. ES (EJF05835.1)]                                                                                  |                                         |
|        | 3822           | Conserved hypothetical protein       | 1189-1776 (+)               | Several BLASTX/IMG hits in BgP, one in BgS; first non- <i>Beggiatoaceae</i> hit by BLASTX/nr is hypothetical protein CRC_01820 [ <i>Cylindrospermopsis raciborskii</i> CS-505 (EFA69593.1)] |                                         |

|       |                |                                   |                     |                                                                                                                                                                                                              |                                    |
|-------|----------------|-----------------------------------|---------------------|--------------------------------------------------------------------------------------------------------------------------------------------------------------------------------------------------------------|------------------------------------|
| 00632 | 0159           | <b>Group II catalytic intron</b>  | 52147-52225 (-)     | Identical to 00762_4278; next two BLASTN/nr hits are BgP and then the other two BOGUAY sequences; first non- <i>Beggiatoaceae</i> match is from <i>Cyanothece</i> sp. PCC 7822, complete genome (CP002198.1) | Coming in from end of contig       |
|       | (not assigned) | Possible fragment of transposase  | ca. 51554-51477 (-) | First BLASTN/nr hit is transposase (fragment) [ <i>Microcystis aeruginosa</i> PCC 9806 (CC114123.1 )]                                                                                                        | Identified by BLASTX/nr in GenBank |
| 00762 | 4278           | <b>Group II catalytic intron</b>  | 2845-2923 (+)       | Identical to 00362_0159; next two BLASTN/nr hits are BgP and then other two BOGUAY; first non- <i>Beggiatoaceae</i> match is from <i>Cyanothece</i> sp. PCC 7822, complete genome (CP002198.1)               | Second ORF on contig               |
|       | 4279           | Retron-type reverse transcriptase | 3026-3544 (+)       | First BLASTX/nr match is BgP; second is RNA-directed DNA polymerase [ <i>Moorea producta</i> 3L (EGJ28487.1)]                                                                                                | First ORF on contig                |
| 00593 | (not assigned) | <b>Group II catalytic intron</b>  | 280-350 (+)         | Identified by BLASTN in IMG/ER with other Group II sequences                                                                                                                                                 | On short (1600 bp) contig          |
|       | 4776           | HicA toxin domain protein         | 861-1013 (+)        | First BLASTX hit in IMG/ER is HicA-related protein [BGP_0189 ]; second is toxin-antitoxin systems (TAS) HicA [ <i>Acetobacter pasteurianus</i> IFO 3283-32, APA32_08280 ]                                    |                                    |
|       | 4777           | HicB family antitoxin             | 1114-1446 (+)       | First BLASTX hit in IMG/ER is HicB-related protein [BGP_0190]; second is HicB-related protein [ <i>Synechococcus</i> sp. PCC 7002, SYNPPCC7002_A1564 ]                                                       |                                    |

163  
164

**Table S4. Putative XisHI genes.** Shorter fragments are indicated by “frag”.

| Code<br>(Fig.<br>6) | XisH       |                | XisI       |                | Gene order and comments                                             |
|---------------------|------------|----------------|------------|----------------|---------------------------------------------------------------------|
|                     | ORF        | length<br>(aa) | ORF        | length<br>(aa) |                                                                     |
| 1                   | 00997_3078 | 139            | 00997_3079 | 111            | 3078 (H) > 3079 (I)                                                 |
| 2                   | 00342_3380 | 138            | 00342_3379 | 110            | 3380 (H) > 3379 (I)                                                 |
| 3                   | 00362_1738 | 138            | 00362_1737 | 112            | 1738 (H) > 1737 (I)                                                 |
| 4                   | 00833_4598 | 138            | 00833_4597 | 111            | RecB fam endo > 4598 (H) ><br>4596 (I) > CRISPR endo                |
| 5                   | 00946_4151 | 138            | 00946_4150 | 116            | 4151 (H) > 4150 (I)                                                 |
| 6                   | 01026_3196 | 138            | 01026_3195 | 111            | 3196 (H) > 3195 (I)                                                 |
| 7                   | 00948_1636 | 123            | 00948_1637 | 110            | 1636 (H) > 1637 (I)                                                 |
| 8                   | 01341_2380 | 103            | 01341_2379 | 111            | 2380 (H) > 2379 (I)                                                 |
| 9                   | 00553_4207 | 103            | 00553_4206 | 93             | 4208 (H frag) > 4207 (H frag) ><br>4206 (short I)                   |
| ---                 | 00553_4208 | 38             |            |                |                                                                     |
| 10                  | 00494_3982 | 42             | 00494_3984 | 111            | 3982 (H frag) > 3983 (H frag)<br>> 3984 (I)                         |
| ---                 | 00494_3983 | 93             |            |                |                                                                     |
| 11                  | 00754_1884 | 45             | 00754_1883 | 111            | 1885 (H frag) > 1884 (H frag)<br>> 1883 (I)                         |
| ---                 | 00754_1885 | 53             |            |                |                                                                     |
| 12                  | 00155_2449 | 56             | 00155_2450 | 37             | 2449 (H frag) > 2450 (I frag)                                       |
| 13                  |            |                | 01159_4377 | 117            | 4377 (At beginning of contig,<br>probably missing upstream<br>XisH) |

165



166 **Table S5. Phylogenetic distribution of XisHI- and “BOGUAY 00024\_0693”-like sequences.** PCC, Pasteur Culture Collection  
 167 cyanobacterial database (<http://www.pasteur.fr/>).  
 168

| IMG/ER Code                | Species                                                                        | Morphology and physiology                                                                                                                                                    | Differentiation | Motility                                                        | Habitat or source                                                                       | Gene copies<br>(-, not found) |      |        | References |
|----------------------------|--------------------------------------------------------------------------------|------------------------------------------------------------------------------------------------------------------------------------------------------------------------------|-----------------|-----------------------------------------------------------------|-----------------------------------------------------------------------------------------|-------------------------------|------|--------|------------|
|                            |                                                                                |                                                                                                                                                                              |                 |                                                                 |                                                                                         | XisH                          | XisI | “0693” |            |
| <i>Gammaproteobacteria</i> |                                                                                |                                                                                                                                                                              |                 |                                                                 |                                                                                         |                               |      |        |            |
| BOGUAY                     | Orange Guaymas<br><i>Beggiatoa</i> ( <i>Cand.</i><br>“ <i>Maribeggiatoa</i> ”) | Multicellular filaments;<br>sulfur oxidizer                                                                                                                                  |                 | Gliding                                                         | Microbial mat near<br>deep-sea<br>hydrothermal vent                                     | 11                            | 12   | 29     | This paper |
| BGP                        | <i>Beggiatoa</i> ( <i>Cand.</i><br>“ <i>Isobeggiatoa</i> ”) sp.<br>PS*         | Multicellular filaments;<br>sulfur oxidizer                                                                                                                                  |                 | Gliding                                                         | Intertidal<br>sediments                                                                 | 4                             | 5    | 27     | (25)       |
| BGS                        | <i>Beggiatoa</i> ( <i>Cand.</i><br>“ <i>Parabeggiatoa</i> ”) sp.<br>SS*        | Multicellular filaments;<br>sulfur oxidizer                                                                                                                                  |                 | Gliding                                                         | Intertidal<br>sediments                                                                 | -                             | -    | 1      | (25)       |
| BegaIDRAFT                 | <i>Beggiatoa alba</i><br>B18LD                                                 | Multicellular filaments;<br>sulfur oxidizer                                                                                                                                  |                 | Gliding                                                         | Rice field ditch<br>sediment                                                            | -                             | 1    | 1      | (26)       |
| A3IKDRAFT                  | <i>Thiothrix flexilis</i> DSM<br>14609                                         | Variable morphology;<br>forms slightly bent<br>filaments, which may<br>include elongated or<br>swollen cells; some strains<br>form rosettes or holdfasts;<br>sulfur oxidizer | Gonidia         | Rosette-<br>forming<br>strains<br>produce<br>gliding<br>gonidia | Activated sludge<br>suffering from<br>bulking                                           | 2                             | 3    | -      | (27)       |
| Thini                      | <i>Thiothrix nivea</i> DSM<br>5205                                             | Single cells, sheathed<br>filaments, or rosettes;<br>sulfur oxidizer                                                                                                         |                 | Gliding                                                         | Sulfide-containing<br>well water; some<br><i>Thiothrix</i> found in<br>activated sludge | -                             | 2    | 1      | (28, 29)   |

169

| <b><i>Chloroflexi</i></b>   |                                                          |                                                                                  |  |         |                                                                    |   |    |   |              |
|-----------------------------|----------------------------------------------------------|----------------------------------------------------------------------------------|--|---------|--------------------------------------------------------------------|---|----|---|--------------|
| CCHmeta                     | <i>Candidatus "Chlorothrix halophila"</i>                | Filamentous; anoxygenic phototroph                                               |  | Gliding | Hypersaline microbial mat (Guerrero Negro)                         | 3 | 3  | 5 | (30)         |
| Haur                        | <i>Herpetosiphon aurantiacus</i> ATCC 23779 (DSM 785)    | Sheathed filaments; unusual cell envelope, not yet completely defined            |  | Gliding | Freshwater lake; some found in activated sludge                    | 4 | 5  | - | (28, 31, 32) |
| OSCT                        | <i>Oscillochloris trichoides</i> DG6                     | Multicellular filaments                                                          |  | Gliding | Sulfide spring                                                     | 1 | -  | - | (33)         |
| Rcas                        | <i>Roseiflexus</i> sp. RS-1                              | Multicellular filaments; thermophilic, anoxygenic phototroph, aerobic chemotroph |  | Gliding | Found in microbial mats                                            | - | -  | 1 | (34)         |
| RoseRS                      | <i>Roseiflexus castenholzii</i> DSM 13941                | Multicellular filaments; thermophilic, anoxygenic phototroph aerobic chemotroph  |  | Gliding | Found in microbial mats                                            | - | -  | 1 | (35)         |
| <b><i>Bacteroidetes</i></b> |                                                          |                                                                                  |  |         |                                                                    |   |    |   |              |
| Fleli                       | <i>Flexibacter litoralis</i> DSM 6794                    | Filamentous                                                                      |  | Gliding | Seawater aquarium outflow                                          | - | -  | 1 | (36)         |
| Halhy                       | <i>Haliscomenobacter hydrossis</i> DSM 1100 (ATCC 27775) | Sheathed, needle-like filaments; chemoorganotroph                                |  | No      | Activated sludge; "probably" found in freshwater environments (37) | 8 | 13 | - | (28, 37)     |
| Runsl                       | <i>Runella slithyformis</i> DSM 19594 (ATCC 29530)       | Curved rods; occasional filaments and coils                                      |  | No      | Freshwater                                                         | 1 | 2  | - | (38)         |
| Slin                        | <i>Spirosoma linguale</i> DSM 74 (ATCC 33905)            | Pleiomorphic: vibroid, horseshoe, ring, and spiral forms                         |  | No      | Laboratory water bath                                              | 2 | 2  | - | (39)         |
| B153DRAFT                   | <i>Spirosoma panaciterrae</i> DSM 21099                  | Rod-shaped                                                                       |  | Gliding | Ginseng field                                                      | 1 | 2  | - | (40)         |

| <b>Planctomycetes</b> |                                                  |                                                                   |                       |                                             |                                              |   |   |   |         |
|-----------------------|--------------------------------------------------|-------------------------------------------------------------------|-----------------------|---------------------------------------------|----------------------------------------------|---|---|---|---------|
| GobsU                 | <i>Gemmata obscuriglobus</i> UQM 2246            | Unicellular; budding                                              |                       | Multitrichous flagella during swarmer stage | Freshwater                                   | - | 1 | - | (41)    |
| <b>Cyanobacteria</b>  |                                                  |                                                                   |                       |                                             |                                              |   |   |   |         |
| AM1                   | <i>Acaryochloris marina</i> MBIC11017            | Unicellular                                                       |                       | No                                          | Symbiont of colonial ascidian (non-obligate) | 1 | 1 | - | (42)    |
| FJ461733              | <i>Anabaena</i> sp. 90                           |                                                                   |                       |                                             | Lake Vesijärvi, Finland                      | - | 1 | 1 | (43)    |
| Ava                   | <i>Anabaena variabilis</i> ATCC 29413 (PCC 7937) | Filamentous                                                       | Heterocysts, akinetes | (no flagella)                               | Freshwater (PCC)                             | 4 | 5 | 1 | (44)    |
| APCC8                 | <i>Arthrospira</i> sp. PCC 8005                  | Filamentous; non-heterocystous                                    |                       |                                             |                                              | 2 | 3 | - | (45)    |
| AmaxDRAFT             | <i>Arthrospira maxima</i> CS-328                 | Filamentous; non-diazotrophic                                     | (no heterocysts)      | Gliding                                     | Freshwater (but salt-tolerant)               | 2 | 3 | - | (46)    |
| SPLC1                 | <i>Arthrospira platensis</i> C1 (PCC 9438)       | Spiral-shaped; filamentous                                        |                       | Non-gliding                                 | Freshwater                                   | 1 | 2 | - | (47)    |
| NIES39                | <i>Arthrospira platensis</i> NIES-39             | Filamentous; non-diazotrophic                                     | (no heterocysts)      | Gliding                                     | Freshwater (but salt-tolerant)               | 5 | 5 | - | (48)    |
| AplaP                 | <i>Arthrospira platensis</i> str. Paraca         | Spiral-shaped                                                     |                       |                                             | Freshwater                                   | 5 | 5 | - |         |
| CwatDRAFT             | <i>Crocospaera watsonii</i> WH 8501              | Unicellular; aerobic nitrogen fixation                            |                       |                                             | South Atlantic                               | 3 | 7 | - | (49-51) |
| Cy51472               | <i>Cyanothece</i> sp. ATCC 51472 (BH63E)         | Unicellular; aerobic diazotroph (internal membranes and granules) |                       |                                             | Seawater, Port Aransas TX                    | 4 | 5 | - | (52)    |
| cce                   | <i>Cyanothece</i> sp. ATCC 51142 (BH68)          | Unicellular; aerobic diazotroph (internal membranes and granules) |                       |                                             | Intertidal area                              | 4 | 5 | - | (52)    |
| CY0110                | <i>Cyanothece</i> sp. CCY0110                    | Unicellular; aerobic diazotroph                                   |                       | No (IMG/ER)                                 | Coastal marine                               | 2 | 2 | - |         |

171

|           |                                                              |                                                                                                        |                                |                 |                                                   |   |    |    |          |
|-----------|--------------------------------------------------------------|--------------------------------------------------------------------------------------------------------|--------------------------------|-----------------|---------------------------------------------------|---|----|----|----------|
| PCC7424   | <i>Cyanothece</i> sp. PCC 7424                               | Unicellular; anaerobic diazotroph                                                                      |                                | No (PCC)        | Rice field soil                                   | 2 | 4  | 1  | (53)     |
| Cyan7425  | <i>Cyanothece</i> sp. PCC 7425                               | Unicellular; anaerobic diazotroph                                                                      |                                | No (PCC)        | Rice field soil                                   | 2 | 2  | 4  | (53)     |
| Cyan7822  | <i>Cyanothece</i> sp. PCC 7822                               | Unicellular; aerobic diazotroph                                                                        | (no heterocysts)               | No (PCC)        | Rice field soil                                   | 4 | 5  | 2  | (54)     |
| PCC8801   | <i>Cyanothece</i> sp. PCC 8801                               | Unicellular; aerobic diazotroph (internal granules...)                                                 |                                | No (PCC)        | Rice field soil                                   | 2 | 4  | 2  | (55)     |
| Cyan8802  | <i>Cyanothece</i> sp. PCC 8802                               | Unicellular; aerobic diazotroph                                                                        |                                | No (PCC)        | Rice field soil                                   | 3 | 4  | 2  | (55)     |
| CRC       | <i>Cylindrospermopsis raciborskii</i> CS-505 (CR1/SDS)       | Straight trichomes (when isolated); diazotrophic                                                       | Heterocysts, tapered end cells |                 | Fresh water                                       | - | -  | 2  | (56, 57) |
| L8106     | <i>Lyngbya</i> sp. PCC 8106                                  | Anaerobic diazotroph (originally reported as aerobic (str. Osc. 23), but PCC says not in pure culture) |                                | Gliding         | Intertidal cyanobacterial mat                     | 3 | 6  | 1  | (58)     |
| MC7420    | <i>Coleofasciculus (Microcoleus) chthonoplastes</i> PCC 7420 | Non-diazotrophic; straight trichomes of cylindrical cells                                              |                                | Yes             | Salt marsh                                        | 6 | 17 | 12 | (53)     |
| ---       | <i>Microcystis aeruginosa</i> NIES-843                       | Unicellular, colony-forming                                                                            |                                |                 | Freshwater lake                                   | 6 | 8  | -  | (59)     |
| N9414     | <i>Nodularia spumigena</i> CCY9414                           | Filamentous                                                                                            | Heterocysts, akinetes          |                 | Baltic Sea surface waters                         | 3 | 7  | 1  | (60)     |
| alr       | <i>Nostoc</i> sp. PCC 7120                                   | Aerobic nitrogen fixation; filamentous                                                                 | Heterocysts                    | No              |                                                   | 1 | 1  | -  | (53, 61) |
| Aazo      | ' <i>Nostoc azollae</i> ' 0708                               | Filamentous (in one life stage), diazotrophic                                                          | Motile hormogonia, akinetes    | Yes             | Symbiont of water fern <i>Azolla filiculoides</i> | 1 | 2  | 1  | (62, 63) |
| Npun      | <i>Nostoc punctiforme</i> PCC 73102 (ATCC 29133)             | Aerobic nitrogen fixation; filamentous                                                                 | Heterocysts, akinetes          | Transient (PCC) | Root section, <i>Macrozamia</i> sp.               | 5 | 8  | 3  | (53)     |
| OscyDRAFT | Oscillatoriales sp. JSC-12                                   |                                                                                                        |                                |                 | Freshwater                                        | 1 | 1  | 2  | (IMG/ER) |

172

172

|            |                                             |                                           |                             |              |                                  |   |   |   |             |
|------------|---------------------------------------------|-------------------------------------------|-----------------------------|--------------|----------------------------------|---|---|---|-------------|
| OSCI       | <i>Oscillatoria</i> sp. PCC 6506            | Anaerobic diazotroph;<br>filamentous      |                             | Yes          |                                  | 4 | 3 | 2 | (53)        |
| CRD        | <i>Raphidiopsis brookii</i> D9              | Straight filaments ; non-<br>diazotrophic | Akinetes; no<br>heterocysts |              | Freshwater                       | - | - | 2 | (57,<br>64) |
| CYB        | <i>Synechococcus</i> sp. JA-2-3B            | Cocoid, unicellular                       |                             | Yes<br>(IMG) | Octopus Spring microbial<br>mat  | - | - | 1 | (65)        |
| SYNPCC7002 | <i>Synechococcus</i> sp. PCC 7002           | Non-diazotrophic                          |                             | No<br>(PCC)  | Fish pen mud                     | 1 | 1 | - | (53)        |
| Syn60A14   | <i>Synechococcus</i> sp. PE A1-1<br>60AY4M2 |                                           |                             |              | Mushroom Spring<br>microbial mat | - | - | 1 | (66)        |
| Syn63A14   | <i>Synechococcus</i> sp. PE A1-1<br>63AY4M1 |                                           |                             |              | Mushroom Spring<br>microbial mat | - | - | 1 | (66)        |
| Syn65A14   | <i>Synechococcus</i> sp. PE A1-1<br>65AY640 |                                           |                             |              | Mushroom Spring<br>microbial mat | - | - | 1 | (66)        |
| Tery       | <i>Trichodesmium erythraeum</i><br>IMS101   | Filamentous, diazotrophic                 | Diazocytes                  | Yes<br>(IMG) | Coastal marine waters            | - | 2 | 7 |             |

173

174

175

\* Partial genomes.

176 **Table S6. Summary of BOGUAY restriction enzyme phylogeny.** ORFs encoding  
 177 putative restriction enzymes and associated DNA modification enzymes were classified  
 178 by comparison with the REBASE database (67); this does not agree in all details with the  
 179 automated annotations. Closest relatives were then identified by BLASTX searches of the  
 180 IMG/ER or GenBank nr databases, which are more complete. See Tables S5-S7 for  
 181 information about individual ORFs. RE, restriction enzyme; MT, DNA  
 182 methyltransferase.

183  
 184

| Classification of<br>closest relative | Type II |    | Type IIG | Type IIS | Type I |    | Type III |    | Type IV |
|---------------------------------------|---------|----|----------|----------|--------|----|----------|----|---------|
|                                       | RE      | MT |          |          | RE     | MT | RE       | MT | RE      |
| <i>Gammaproteobacteria</i>            | 3       | 4  |          |          |        |    |          |    | 1       |
| <i>Betaproteobacteria</i>             | 3       | 1  | 1        |          |        |    |          |    |         |
| <i>Deltaproteobacteria</i>            |         |    | 1        | 1        |        | 1  |          |    |         |
| <i>Epsilonproteobacteria</i>          |         | 1  | 1        |          |        |    |          |    |         |
| <i>Cyanobacteria</i>                  | 1       | 4  | 4        | 2        | 3      |    |          |    |         |
| <i>Bacteroidetes</i>                  | 2       | 3  | 4        |          |        |    |          |    |         |
| <i>Chloroflexi</i>                    |         |    | 1        |          |        |    |          | 1  |         |
| OP1                                   | 1       |    |          |          |        |    |          |    |         |
| <i>Firmicutes</i>                     |         | 2  | 1        |          |        |    |          |    |         |
| <i>Mycoplasma</i>                     |         | 1  |          |          |        |    |          |    |         |
| <i>Chlorobi</i>                       |         |    | 1        |          |        |    | 1        |    |         |
|                                       |         |    |          |          |        |    |          |    |         |
| Archaea                               |         | 1  | 13       |          |        |    |          |    |         |

185

185 **TABLE S7. Candidate Type II restriction/modification genes.** Methyltransferases  
 186 (MTs) and restriction enzymes (REs) are grouped by the putative or experimentally  
 187 verified recognition site of the closest relative found in REBASE ((67); not shown), with  
 188 groups separated by heavy lines. The upstream ORF of a pair or group is listed first,  
 189 where relevant.  
 190

|      |                                                      |                                                                                                | First non- <i>Beggiatoaceae</i> BLASTX hit in IMG/ER or GenBank*<br>(September 2012) |                      |                                                        |             |
|------|------------------------------------------------------|------------------------------------------------------------------------------------------------|--------------------------------------------------------------------------------------|----------------------|--------------------------------------------------------|-------------|
| Role | IMG/ER locus tag                                     | Notes                                                                                          | IMG/ER or GenBank ID                                                                 | Phylogenetic group   | Species                                                | Expectation |
| RE   | 00065_4458<br>(plus sequence to beginning of contig) | Conserved domain protein; at beginning of contig, probably missing some upstream sequence      | Thini_1894                                                                           | Gamma-proteobacteria | <i>Thiothrix nivea</i> JP2, DSM 5205                   | 8e-20       |
| MT   | 00065_4457                                           | DNA (cytosine-5)-methyltransferase                                                             | Thini_1895                                                                           | Gamma-proteobacteria | <i>Thiothrix nivea</i> JP2, DSM 5205                   | 0e+00       |
| MT   | 00125_3719                                           | DNA (cytosine-5)-methyltransferase; ORFs are head-to-head; no other evident RE or MTase nearby | NMBNZ0533_0312                                                                       | Beta-proteobacteria  | <i>Neisseria meningitidis</i> NZ-05/33                 | 0e+00       |
| RE   | 00125_3720                                           | ScaI restriction endonuclease                                                                  | NMBNZ0533_0311                                                                       | Beta-proteobacteria  | <i>Neisseria meningitidis</i> NZ-05/33                 | 7e-48       |
| RE   | 00161_4393                                           | hindVP restriction endonuclease                                                                | NIES39_A03530                                                                        | Cyanobacteria        | <i>Arthrospira platensis</i> NIES-39                   | 0e+00       |
| MT   | 00161_4392                                           | DNA (cytosine-5)-methyltransferase                                                             | cce_4745                                                                             | Cyanobacteria        | <i>Cyanothece</i> sp. BH68, ATCC 51142                 | 0e+00       |
| RE?  | 01171_2312                                           | conserved hypothetical protein                                                                 | AAR23810.1                                                                           | Beta-proteobacteria  | <i>Neisseria mucosa</i> subsp. <i>heidelbergiensis</i> | 2e-81       |
| MT   | 01171_2313                                           | DNA (cytosine-5)-methyltransferase                                                             | ZP_03273423.1                                                                        | Cyanobacteria        | <i>Arthrospira maxima</i> CS-328                       | 6e-174      |
| MT   | 00198_4532                                           | Site-specific DNA methylase                                                                    | ZP_10103377.1                                                                        | Gamma-proteobacteria | <i>Thiothrix nivea</i> DSM 5205                        | 3e-81       |
| RE?  | 00198_4533                                           | conserved hypothetical protein                                                                 | ZP_10103376.1                                                                        | Gamma-proteobacteria | <i>Thiothrix nivea</i> DSM 5205                        | 7e-89       |
| RE   | 00286_0609                                           | ApaI-like restriction endonuclease                                                             | ZP_01688676.1                                                                        | Bacteroidetes        | <i>Microcilla marina</i> ATCC 23134                    | 2e-105      |
| MT   | 00286_0610                                           | DNA (cytosine-5)-methyltransferase; frame shift and change in quality of match at ORF boundary | YP_004870322.1                                                                       | Gamma-proteobacteria | <i>Glaciecola nitratireducens</i> FR1064               | 5e-130      |
|      | 00286_0611                                           | DNA (cytosine-5)-methyltransferase                                                             |                                                                                      |                      |                                                        |             |
| MT   | 00935_1705                                           | DNA (cytosine-5)-methyltransferase; No evident RE nearby                                       | ref ZP_03272602.1                                                                    | Cyanobacteria        | <i>Arthrospira maxima</i> CS-328                       | 8e-103      |
| MT   | 00632_0145                                           | DNA (cytosine-5)-methyltransferase; no evident RE nearby                                       | CCI06041.1                                                                           | Cyanobacteria        | <i>Microcystis aeruginosa</i> PCC 7941                 | 3e-109      |
| MT   | 00594_4464                                           | DNA methylase                                                                                  | YP_003443578.1                                                                       | Gamma-proteobacteria | <i>Allochromatium vinosum</i> DSM 180                  | 3e-93       |
| RE   | 00594_4463                                           | Bpu10I restriction endonuclease                                                                | YP_003443577.1                                                                       | Gamma-proteobacteria | <i>Allochromatium vinosum</i> DSM 180                  | 3e-122      |

191

|     |            |                                                                                                                                                                                                |                |                        |                                             |        |
|-----|------------|------------------------------------------------------------------------------------------------------------------------------------------------------------------------------------------------|----------------|------------------------|---------------------------------------------|--------|
| MT  | 00830_3287 | modification methylase BsoBI family protein                                                                                                                                                    | P70986.2       | Firmicutes             | <i>Geobacillus stearothermophilus</i>       | 1e-178 |
| RE  | 00830_3286 | Xcyl restriction endonuclease                                                                                                                                                                  | BAL54860.1     | OP1                    | uncultured candidate division OP1 bacterium | 2e-124 |
| MT  | 00873_2163 | DNA adenine methylase                                                                                                                                                                          | ZP_03391304.1  | Bacteroidetes          | <i>Capnocytophaga sputigena</i> Capno       | 3e-134 |
| RE  | 00873_2164 | DpmlI restriction endonuclease                                                                                                                                                                 | EJF45781.1     | Bacteroidetes          | <i>Capnocytophaga ochracea</i> str. Holt 25 | 8e-115 |
| MT  | 00076_3240 | DNA N-6-adenine-methyltransferase (Dam); no evident RE nearby                                                                                                                                  | YP_875554.1    | Archaea                | <i>Cenarchaeum symbiosum</i> A              | 9e-73  |
| RE  | 01168_5011 | Restriction endonuclease BgIII. Only ORF annotated on short contig; seems to be missing a little of beginning of protein. Downstream part of contig gave nothing obvious.                      | YP_002463562.1 | Chloroflexi            | <i>Chloroflexus aggregans</i> DSM 9485      | 1e-101 |
| MT  | 00623_4986 | DNA (cytosine-5)-methyltransferase; only ORF annotated on short contig                                                                                                                         | AAO48713.1     | Firmicutes             | <i>Geobacillus stearothermophilus</i>       | 3e-144 |
| RE? | 00390_4915 | Conserved domain protein; BLASTP with cognate methyltransferase (MSsp6803I, REBASE) found no new methyltransferases in BOGUAY genome. Possibly belongs with part of downstream ORF 00390_4913. | ZP_08466487.1  | Beta-proteobacteria    | <i>Kingella kingae</i> ATCC 23330           | 1e-30  |
| MT  | 00632_0150 | DNA (cytosine-5)-methyltransferase. Internal to contig, no REs evident nearby.                                                                                                                 | YP_002960718.1 | Mycoplasmas            | <i>Mycoplasma conjunctivae</i> HRC/581      | 2e-137 |
| MT  | 00260_3510 | DNA (cytosine-5)-methyltransferase; Internal to contig, no REs evident nearby; ORFs appear to be fragments of a single gene; BLASTX result is for two combined.                                | EIA42719.1     | Epsilon-proteobacteria | <i>Campylobacter coli</i> 90-3              | 4e-166 |
|     | 00260_3511 |                                                                                                                                                                                                |                |                        |                                             |        |
| MT  | 01017_0763 | type II DNA modification methyltransferase M.TdellI; internal to contig, no REs evident nearby                                                                                                 | YP_003140803.1 | Bacteroidetes          | <i>Capnocytophaga ochracea</i> DSM 7271     | 0.0    |
| MT  | 00696_0279 | Internal to contig, no REs evident nearby; ORFs appear to be fragments of a single gene; BLASTX result is for two combined.                                                                    | ZP_07628911.1  | Bacteroidetes          | <i>Prevotella amnii</i> CRIS 21A-A          | 1e-56  |
|     | 00696_0278 |                                                                                                                                                                                                |                |                        |                                             |        |

192  
193  
194

\* IMG/ER had occasional capacity issues, so GenBank was used. Where tested, the two databases gave similar results.



194  
195

**Table S8. Possible type IIG restriction/methylation enzymes.**

|                  |                                                                                                                                                                                                 | First non- <i>Beggiatoa</i> BLASTX hit in IMG/ER or GenBank*<br>(September 2012) |                    |                                      |             |
|------------------|-------------------------------------------------------------------------------------------------------------------------------------------------------------------------------------------------|----------------------------------------------------------------------------------|--------------------|--------------------------------------|-------------|
| IMG/ER locus tag | Notes                                                                                                                                                                                           | IMG/ER or GenBank ID                                                             | Phylogenetic group | Species                              | Expectation |
| 01346_4733       | Conserved domain protein. At end of small contig; gene probably continues past it. See also 01346_4732 below. 01346_4733, 00815_4735, and 01192_0160 nearly identical.                          | YP_005921158.1                                                                   | Archaea            | <i>Methanosaeta harundinacea</i> 6Ac | 2e-14       |
| 00815_4735       | Hypothetical protein. At end of contig; possibly should be fused upstream with 00815_4734 (below); gene probably continues downstream. 01346_4733, 00815_4735, and 01192_0160 nearly identical. | YP_005921158.1                                                                   | Archaea            | <i>Methanosaeta harundinacea</i> 6Ac | 2e-18       |
| 01192_0160       | Conserved domain protein. At end of contig, gene probably continues downstream. 01346_4733, 00815_4735, and 01192_0160 nearly identical.                                                        | YP_005921158.1                                                                   | Archaea            | <i>Methanosaeta harundinacea</i> 6Ac | 2e-15       |
| 01171_2301       | Type I restriction enzyme R protein N-terminus (HSDR_N). Match covers only a small part of BmuSORF1564P (REBASE).                                                                               | YP_005920925.1                                                                   | Archaea            | <i>Methanosaeta harundinacea</i> 6Ac | 1e-141      |
| 00513_4066       | Conserved hypothetical protein. At beginning of short contig, gene probably continues upstream; should probably be joined with 01097_5208                                                       | YP_005921158.1                                                                   | Archaea            | <i>Methanosaeta harundinacea</i> 6Ac | 2e-94       |
| 01097_5208       | Conserved domain protein. Alone on contig; should probably be joined with 00513_4066                                                                                                            | YP_001047072.1                                                                   | Archaea            | <i>Methanoculleus marisnigri</i> JR1 | 3e-76       |
| 00205_2665       | Conserved domain protein. At beginning of contig; matches second part of McoGP6ORF996P. Probably not directly linked to 01307_4975 (gap in match).                                              | YP_004383567.1                                                                   | Archaea            | <i>Methanosaeta concilii</i> GP6     | 2e-127      |
| 01434_4930       | Conserved domain protein. Alone on contig, gene probably continues to either side; similar but not identical to 01293_5122                                                                      | YP_006545502                                                                     | Archaea            | <i>Methanoculleus bourgensis</i> MS2 | 1e-132      |

196

|            |                                                                                                                                                                                 |                 |                      |                                           |        |
|------------|---------------------------------------------------------------------------------------------------------------------------------------------------------------------------------|-----------------|----------------------|-------------------------------------------|--------|
| 01293_5122 | Conserved hypothetical protein. Alone on contig, gene probably continues to either side; similar but not identical to 01434_4930.                                               | Aboo_1333       | Archaea              | <i>Aciduliprofundum boonei</i> T469       | 1e-68  |
| 01051_2212 | N-6 DNA methylase.                                                                                                                                                              | ThePKDRAFT_1685 | Archaea              | <i>Thermococcus</i> sp. PK                | 0e+00  |
| 00462_4797 | Eco57I restriction endonuclease. Only ORF annotated on contig; sequence probably continues to either side.                                                                      | AAU84371.1      | Archaea              | uncultured archaeon GZfos9D8              | 1e-86  |
| 00686_4838 | Conserved domain protein. Alone on contig, gene probably continues upstream                                                                                                     | AAU84371.1      | Archaea              | uncultured archaeon GZfos9D8              | 1e-68  |
| 00796_5264 | Type I restriction enzyme R protein N-terminus (HSDR_N). Alone on contig, gene may continue upstream                                                                            | AAU82382.1      | Archaea              | Uncultured archaeon GZfos17C7             | 2e-66  |
| 00921_4204 | Hypothetical protein. At end of contig, gene probably continues downstream.                                                                                                     | CBH38221.1      | Archaea              | Uncultured archaeon                       | 1e-07  |
| 01346_4732 | Eco57I restriction endonuclease. At beginning of small contig, gene probably continues upstream. See also 01346_4733 above.                                                     | ZP_01628230.1   | Cyanobacteria        | <i>Nodularia spumigena</i> CCY9414        | 3e-50  |
| 00202_4928 | Conserved domain protein. Alone on contig, gene probably continues upstream                                                                                                     | ZP_01630033.1   | Cyanobacteria        | <i>Nodularia spumigena</i> CCY9414        | 9e-52  |
| 00814_5069 | Conserved domain protein. Alone on contig, gene probably continues to either side; match is to more upstream part of target than for 01293_5122 or 01434_4930, with gap between | ZP_01628230.1   | Cyanobacteria        | <i>Nodularia spumigena</i> CCY9414        | 4e-101 |
| 00014_2805 | ORFs seem to be fragments of a single gene                                                                                                                                      | CCI20701.1      | Cyanobacteria        | <i>Microcystis aeruginosa</i> PCC 9807    | 0e+00  |
| 00014_2806 |                                                                                                                                                                                 |                 |                      |                                           |        |
| 01343_3636 | Type I restriction enzyme R protein N-terminus (HSDR_N). At end of contig, gene probably continues downstream.                                                                  | ZP_10245112.1   | Chloroflexi          | <i>Nitrolancetus hollandicus</i> Lb       | 4e-87  |
| 01307_4975 | Restriction enzyme Eco57I domain protein. Alone on contig, gene probably continues in both directions.                                                                          |                 |                      |                                           | 7e-157 |
| 00163_1009 | DNA methylase.                                                                                                                                                                  | ZP_08504525.1   | Beta-proteobacteria  | <i>Methyloversatilis universalis</i> FAM5 | 0e+00  |
| 00815_4734 | Conserved domain protein. One of only two ORFs on contig - see 00815_4735 above. Gene may continue upstream.                                                                    | ZP_07203318.1   | Delta-proteobacteria | Delta proteobacterium NaphS2              | 9e-100 |

|            |                                                                                                                  |                |                        |                                             |        |
|------------|------------------------------------------------------------------------------------------------------------------|----------------|------------------------|---------------------------------------------|--------|
| 00414_4874 | Eco57I restriction endonuclease. Alone on contig; gene probably continues downstream.                            | ZP_10404968.1  | Epsilon-proteobacteria | <i>Thiovulum</i> sp. ES                     | 2e-169 |
| 00574_4989 | Eco57I restriction endonuclease. Alone on contig.                                                                | YP_003996560.1 | Bacteroidetes          | <i>Leadbetterella byssophila</i> DSM 17132  | 2e-48  |
| 01256_5046 | Type I restriction enzyme R protein N-terminus (HSDR_N). Alone on contig; gene probably continues on either end. | MED217_09797   | Bacteroidetes          | <i>Leeuwenhoekiella blandensis</i> MED217   | 0e+00  |
| 01133_5261 | Hypothetical protein. Alone on contig, gene probably continues on either end; nearly identical to 01355_5253.    | MED217_09797   | Bacteroidetes          | <i>Leeuwenhoekiella blandensis</i> MED217   | 3e-73  |
| 01355_5253 | Hypothetical protein. Alone on contig, gene probably continues on either end; nearly identical to 01355_5261.    | MED217_09797   | Bacteroidetes          | <i>Leeuwenhoekiella blandensis</i> MED217   | 8e-76  |
| 01223_4511 | Eco57I restriction endonuclease. ORFs seem to be fragments of same gene                                          | ZP_04060130.1  | Firmicutes             | <i>Staphylococcus hominis</i> SK119         | 5e-70  |
| 01223_4512 |                                                                                                                  |                |                        |                                             |        |
| 00541_3766 | BseRI endonuclease family protein                                                                                | Ctha_1068      | Chlorobi               | <i>Chloroherpeton thalassium</i> ATCC 35110 | 2e-30  |

197  
198  
199  
200

\* IMG/ER had occasional capacity issues, so GenBank was used. Where tested, the two databases gave similar results.

200  
201  
202

**Table S9. Potential Type I, IIS, III, and IV restriction/modification systems. Put., putative.**

| First non- <i>Beggiatoa</i> BLASTX hit in IMG/ER or GenBank*<br>(September 2012) |                  |                                                                     |                      |                      |                                                 |             |
|----------------------------------------------------------------------------------|------------------|---------------------------------------------------------------------|----------------------|----------------------|-------------------------------------------------|-------------|
| Role                                                                             | IMG/ER locus tag | Notes                                                               | IMG/ER or GenBank ID | Phylogenetic group   | Species                                         | Expectation |
| <b>TYPE I</b>                                                                    |                  |                                                                     |                      |                      |                                                 |             |
| RE                                                                               | 00287_3058       | Type I restriction enzyme R protein N-terminus (HSDR_N)             | OSCI_870027          | Cyanobacteria        | <i>Oscillatoria</i> sp. PCC 6506                | 5e-63       |
| RE                                                                               | 00871_2430       | Type I restriction enzyme R protein N-terminus (HSDR_N)             | OSCI_870027          | Cyanobacteria        | <i>Oscillatoria</i> sp. PCC 6506                | 2e-55       |
| RE                                                                               | 01192_0187       | Type I restriction enzyme R protein N-terminus (HSDR_N)             | CRC_02234            | Cyanobacteria        | <i>Cylindrospermopsis raciborskii</i> CS-505    | 2e-09       |
| MT                                                                               | 01248_2637       | N-6 DNA Methylase                                                   | DND132_0555          | Delta-proteobacteria | <i>Desulfovibrio</i> sp. ND132                  | 6e-86       |
| <b>TYPE IIS</b>                                                                  |                  |                                                                     |                      |                      |                                                 |             |
| MT                                                                               | 00948_1621       | N-6 DNA Methylase                                                   | SYNPCC7002_F0089     | Cyanobacteria        | <i>Synechococcus</i> sp. PCC 7002               | 0e+00       |
| MT                                                                               | 00948_1622       | Type I restriction modification DNA specificity domain protein      | Gura_3599            | Delta-proteobacteria | <i>Geobacter uraniireducens</i> Rf4             | 2e-75       |
| MT                                                                               | 00375_5197       | Conserved domain protein; on small contig with two other short ORFs | OSCI_870027          | Cyanobacteria        | <i>Oscillatoria</i> sp. PCC 6506                | 1e-10       |
| <b>TYPE III</b>                                                                  |                  |                                                                     |                      |                      |                                                 |             |
| RE                                                                               | 00264_4522       | hypothetical protein                                                | Cpha266_0934         | Chlorobi             | <i>Chlorobium phaeobacteroides</i> DSM 266      | 1e-20       |
| MT                                                                               | 00264_4523       | DNA methylase                                                       | Rcas_4397            | Chloroflexi          | <i>Roseiflexus castenholzii</i> HLO8, DSM 13941 | 0e+00       |
| <b>TYPE IV</b>                                                                   |                  |                                                                     |                      |                      |                                                 |             |
| RE                                                                               | 00282_5161       | Conserved domain protein                                            | A3G3DRAFT_00738      | Gamma-proteobacteria | <i>Moraxella boevrei</i> DSM 14165              | 1e-30       |

203  
204  
205  
206  
207

\* IMG/ER had occasional capacity issues, so GenBank was used. Where tested, the two databases gave similar results.

207 **Table S10. Summary of putative BOGUAY toxin and antitoxin genes.** See Table  
 208 S9 for details of location and arrangement.  
 209  
 210  
 211  
 212

| <b>Toxins</b>     |               | <b>Antitoxins</b> |               |
|-------------------|---------------|-------------------|---------------|
| <b>Category</b>   | <b>Number</b> | <b>Category</b>   | <b>Number</b> |
| HicA              | 14            | HicB              | 16            |
| MazF              | 8             | MazE              | 1             |
| RelE              | 23            | RelB/DinJ         | 2             |
| HigB              | 1             | HigA              | 7             |
| Txe/YoeB          | 5             | Axe               | 1             |
| PemK/Doc          | 1             | PHD               | 11            |
| HipA              | 2             |                   |               |
| PIN domain family | 33            |                   |               |
| Fic domain family | 5             |                   |               |
|                   |               | AbrB              | 8             |
|                   |               | Xre               | 14            |
| Unclassified      | 21            | Unclassified      | 43            |
|                   |               |                   |               |
|                   |               |                   |               |
| <b>TOTAL</b>      | <b>113</b>    | <b>TOTAL</b>      | <b>103</b>    |

213

213  
214  
215

**Table S11. Putative toxin-antitoxin system operons.** Genes were annotated by JCVI, JGI, and/or RAST unless otherwise indicated.

| <b><u>Toxin</u> and/or antitoxin (<i>contigs</i>)</b>                                 | <b>Occur-<br/>rences</b> | <b>Notes</b>                                                                                                                                                                                    |
|---------------------------------------------------------------------------------------|--------------------------|-------------------------------------------------------------------------------------------------------------------------------------------------------------------------------------------------|
| <b>Toxin directly upstream of antitoxin (27)</b>                                      |                          |                                                                                                                                                                                                 |
| <u>HicA</u> > <u>HicB</u> > (162, 593, 1124)                                          | 3                        |                                                                                                                                                                                                 |
| <u>HicA</u> > <u>AbrB</u> > (832)                                                     | 1                        |                                                                                                                                                                                                 |
| <u>HicA</u> > <u>antitoxin</u> > (472)                                                | 1                        |                                                                                                                                                                                                 |
| <u>RelE</u> > <u>HigA</u> > (106, 260)                                                | 2                        |                                                                                                                                                                                                 |
| <u>RelE</u> (JGI)/ <u>HigB</u> (RAST)> <u>HigA</u> > (1092)                           | 1                        |                                                                                                                                                                                                 |
| <u>RelE</u> > <u>Xre</u> > (253, 804, 1014, 1090, 1124)                               | 5                        |                                                                                                                                                                                                 |
| <u>RelE</u> > <u>HicB</u> > (261)                                                     | 1                        |                                                                                                                                                                                                 |
| <u>HigB</u> > <u>HigA</u> > (59)                                                      | 1                        | Possible HigB identified by BLASTX upstream of HigA (00059_1216)                                                                                                                                |
| <u>toxin</u> > <u>Xre</u> antitoxin> (64, 763)                                        | 2                        | One possible antitoxin gene (00763_4162) found by PSI-BLAST                                                                                                                                     |
| <u>toxin</u> > <u>antitoxin</u> > (100, 100, 105, 404, 472, 759, 775, 779, 997, 1102) | 10                       | Two occurrences on contig 0100 are in tandem; one possible antitoxin gene (00100_0028) found by PSI-BLAST                                                                                       |
| <b>Antitoxin directly upstream of toxin (36)</b>                                      |                          |                                                                                                                                                                                                 |
| <u>HicB</u> > <u>HicA</u> > (11, 297, 348, 665, 855, 945)                             | 6                        |                                                                                                                                                                                                 |
| ( <u>RelB</u> )> <u>RelE</u> (JGI)/ <u>YafQ</u> (RAST)> (1185)                        | 1                        | Possible RelB gene found by BLASTX upstream of 01185_3401                                                                                                                                       |
| PHD> <u>RelE</u> > (1069)                                                             | 1                        |                                                                                                                                                                                                 |
| antitoxin> <u>RelE</u> > (852, 938, 938, 1124)                                        | 4                        | Two possible antitoxin genes (00825_3969 and intergenic region downstream of 00938_0720) and one possible RelE gene (00938_0740) identified by BLASTX searches upstream of annotated RelE genes |
| ( <u>MazE</u> )> <u>MazF</u> > (1160)                                                 | 1                        | 01160_3501 identified as possible MazE gene by PSI-BLAST                                                                                                                                        |
| <u>AbrB</u> > <u>MazF</u> > (945)                                                     | 1                        |                                                                                                                                                                                                 |
| antitoxin> <u>MazF</u> > (472)                                                        | 1                        |                                                                                                                                                                                                 |
| PHD(JGI)/ <u>YefM</u> (RAST)> <u>Txe</u> / <u>YoeB</u> > (935)                        | 1                        |                                                                                                                                                                                                 |
| <u>Xre</u> > <u>HipA</u> > (469)                                                      | 1                        |                                                                                                                                                                                                 |
| PHD> <u>PIN</u> family toxin> (666, 1142, 1223)                                       | 3                        |                                                                                                                                                                                                 |
| <u>AbrB</u> > <u>Pin</u> family toxin> (822, 1171, 1279)                              | 3                        |                                                                                                                                                                                                 |
| antitoxin> <u>PIN</u> family toxin> (25, 205, 359, 692, 696, 791, 1113, 1236)         | 8                        | Two possible antitoxin genes (00696_0277 and intergenic region upstream of 00205_2659) and one possible PIN family toxin gene (00692_3338) identified by BLASTX or PSI-BLAST                    |
| antitoxin> <u>Fic</u> domain toxin> (162)                                             | 1                        | Possible toxin gene (00162_0498) identified by PSI-BLAST                                                                                                                                        |
| antitoxin> <u>toxin</u> > (241, 322, 606, 1308)                                       | 4                        | One possible toxin gene identified by BLASTX downstream of an annotated toxin gene (00606_4541)                                                                                                 |

216

| <b>Tandem repeats of <u>MazF</u> toxin (2)</b>                                                                               |    |                                                                                                      |
|------------------------------------------------------------------------------------------------------------------------------|----|------------------------------------------------------------------------------------------------------|
| <u>AbrB</u> (JGI)/ <u>MazE</u> (RAST)> <u>MazF</u> > <u>MazF</u> > (1220)                                                    | 1  | At end of very short contig                                                                          |
| <u>AbrB</u> > <u>MazF</u> > <u>MazF</u> > (1124)                                                                             | 1  |                                                                                                      |
| <b><u>Toxin</u>&gt;<u>antitoxin</u>&gt;<u>toxin</u> (1)</b>                                                                  |    |                                                                                                      |
| <u>RelE</u> > <u>Xre</u> > <u>PIN family toxin</u> > (1302)                                                                  | 1  | No obvious additional antitoxin nearby                                                               |
| <b><u>Toxin</u>&gt;<u>antitoxin</u>&gt;<u>antitoxin</u> (1)</b>                                                              |    |                                                                                                      |
| <u>RelE</u> > <u>HigA</u> > <u>RelB</u> / <u>DinJ</u> > (130)                                                                | 1  | At end of contig                                                                                     |
| <b><u>Antitoxin</u>&gt;<u>Toxin</u>&gt;<u>Toxin</u>&gt; (1)</b>                                                              |    |                                                                                                      |
| <u>Axe</u> > <u>Txe</u> / <u>YoeB</u> > <u>RelE</u> > (1192)                                                                 | 1  | Internal to contig                                                                                   |
| <b><u>Toxins</u> with no adjacent antitoxin (41)</b>                                                                         |    |                                                                                                      |
| <u>HicA</u> > (95, 971, 1026)                                                                                                | 3  | One is on very short contig (00095_5170); one (01026_3179) has ORF with weak PHD similarity upstream |
| <u>RelE</u> > (139, 523, 696, 1142, 1279)                                                                                    | 5  | One (00523_4677) is at the end of a contig                                                           |
| <u>MazF</u> > (871)                                                                                                          | 1  | At beginning of short contig, no obvious antitoxin nearby                                            |
| <u>Txe</u> / <u>YoeB</u> > (92, 362, 1308)                                                                                   | 3  | One at beginning of contig, two internal to contigs with no obvious antitoxin genes nearby           |
| <u>HipA</u> > (614)                                                                                                          | 1  | Internal to contig, no obvious antitoxin gene nearby                                                 |
| <u>PIN family toxin</u> > (168, 318, 364, 369, 696, 835, 865, 883, 938, 948, 1026, 1051, 1056, 1155, 1159, 1171, 1171, 1197) | 18 | One at beginning of contig, three near ends of contigs, rest internal to contigs                     |
| <u>Fic domain toxin</u> > (239, 692, 804, 1142)                                                                              | 4  | One at beginning of a contig, one at end, two internal                                               |
| <u>PemK</u> (JGI)/ <u>Doc</u> (RAST)> (822)                                                                                  | 1  | Internal to contig, no obvious antitoxin gene nearby                                                 |
| <u>toxin</u> > (97, 138, 445, 1026, 1142)                                                                                    | 5  | One internal to contig, three at end of contigs, one at beginning                                    |
| <b><u>Antitoxins</u> with no adjacent toxin (34)</b>                                                                         |    |                                                                                                      |
| <u>HicB</u> > (311, 337, 664, 666, 855, 1051)                                                                                | 6  | All are internal to contigs                                                                          |
| <u>HigA</u> > (244, 1070)                                                                                                    | 2  | One internal to a contig, one at beginning; no apparent toxin genes near either one                  |
| <u>Xre</u> > (191, 267, 318, 694, 746)                                                                                       | 5  | One is at beginning of contig, others are internal                                                   |
| <u>AbrB</u> > (585)                                                                                                          | 1  | Internal to contig, no obvious toxin gene nearby                                                     |
| <u>PHD</u> > (64, 79, 264, 316, 597, 1301)                                                                                   | 6  | Two at beginning of contigs, one at end of contig, three internal to contigs                         |
| <u>antitoxin</u> > (39, 91, 121, 138, 285, 523, 835, 848, 851, 948, 991, 1159, 1179, 1232)                                   | 14 | Eight internal to contigs, three at beginning, three at end                                          |

217 **Table S12. Unidentified or partially identified BOGUAY ORFs with high similarity to cyanobacterial sequences.** The  
 218 cyanobacterial match from a BLASTP search of UniProt (68) with the lowest e-value is shown for each ORF. ORFs putatively  
 219 encoding mobile elements or genes commonly transferred by them (restriction enzymes, transposases, XisH elements,  
 220 toxin/antitoxin systems, etc.) are not included; some are shown elsewhere. UniProt reports the five best BLASTP matches  
 221 above a cutoff value ( $E\text{-value} \leq 1.00E\text{-}05$ ); many of these proteins also had high-scoring non-cyanobacterial matches.  
 222

| IMG/ER identification<br>(number of proteins) | BOGUAY<br>ORF | Length | %id   | Score | e-value  | UniProt ID of<br>match | Protein name of match                                                                                      | Organism name                                                          |
|-----------------------------------------------|---------------|--------|-------|-------|----------|------------------------|------------------------------------------------------------------------------------------------------------|------------------------------------------------------------------------|
| <b>conserved domain proteins<br/>(16)</b>     | 00065_4458    | 327    | 62.79 | 55.1  | 2.00E-06 | A0ZGZ3_NODSP           | Putative uncharacterized protein                                                                           | <i>Nodularia spumigena</i> CCY9414                                     |
|                                               | 00162_0494    | 1015   | 50.86 | 113   | 5.00E-24 | B4VH37_9CYAN           | Putative uncharacterized protein                                                                           | <i>Coleofasciculus (Microcoleus)</i><br><i>chthonoplastes</i> PCC 7420 |
|                                               | 00282_5161    | 462    | 63.74 | 112   | 1.00E-23 | P72665_SYNY3           | LlaI.2 protein                                                                                             | <i>Synechocystis</i> sp. PCC 6803                                      |
|                                               | 00316_2957    | 204    | 58.16 | 242   | 1.00E-62 | B4W057_9CYAN           | Putative uncharacterized protein                                                                           | <i>Coleofasciculus (Microcoleus)</i><br><i>chthonoplastes</i> PCC 7420 |
|                                               | 00390_4915    | 205    | 58.33 | 117   | 5.00E-25 | Q4BYE4_CROWT           | Putative uncharacterized protein                                                                           | <i>Crocospaera watsonii</i> WH 8501                                    |
|                                               | 00392_3127    | 205    | 55    | 70.5  | 5.00E-11 | C7QWM8_CYAP0           | Putative uncharacterized protein                                                                           | <i>Cyanothece</i> sp. PCC 8802                                         |
|                                               | 00467_2253    | 859    | 64.76 | 148   | 2.00E-34 | B8HKK8_CYAP4           | Metallophosphoesterase                                                                                     | <i>Cyanothece</i> sp. PCC 7425                                         |
|                                               | 00472_0541    | 498    | 51.95 | 82.8  | 1.00E-14 | B2IVA1_NOSP7           | Putative uncharacterized protein                                                                           | <i>Nostoc punctiforme</i> PCC 73102                                    |
|                                               | 00521_4854    | 368    | 54.97 | 172   | 1.00E-41 | B1WNM1_CYAA5           | Probable glycosyl transferase                                                                              | <i>Cyanothece</i> sp. ATCC 51142                                       |
|                                               | 00696_0331    | 684    | 51.61 | 59.3  | 1.00E-07 | C7QYC7_CYAP0           | GUN4 domain protein                                                                                        | <i>Cyanothece</i> sp. PCC 8802                                         |
|                                               | 00787_5175    | 603    | 64.36 | 275   | 1.00E-72 | Q112E2_TRIEI           | Putative uncharacterized protein                                                                           | <i>Trichodesmium erythraeum</i><br>IMS101                              |
|                                               | 00970_5280    | 2361   | 54.14 | 185   | 2.00E-45 | Q3M1D8_ANAVT           | Serine/threonine protein kinase and<br>signal transduction histidine kinase<br>with GAF and PAS/PAC sensor | <i>Anabaena variabilis</i> ATCC 29413                                  |



**Conserved hypothetical proteins (36)**

|            |      |       |      |           |              |                                                                                                      |                                                              |
|------------|------|-------|------|-----------|--------------|------------------------------------------------------------------------------------------------------|--------------------------------------------------------------|
| 01049_5275 | 2361 | 52.69 | 184  | 4.00E-45  | Q3M1D8_ANAVT | Serine/threonine protein kinase and signal transduction histidine kinase with GAF and PAS/PAC sensor | <i>Anabaena variabilis</i> ATCC 29413                        |
| 01113_1154 | 259  | 62.34 | 98.2 | 2.00E-19  | Q3M8J7_ANAVT | Putative uncharacterized protein                                                                     | <i>Anabaena variabilis</i> ATCC 29413                        |
| 01183_4449 | 292  | 58.93 | 65.5 | 2.00E-09  | B4VMX7_9CYAN | Putative uncharacterized protein                                                                     | <i>Coleofasciculus (Microcoleus) chthonoplastes</i> PCC 7420 |
| 01285_3954 | 503  | 52.17 | 149  | 1.00E-34  | A3IV21_9CHRO | Sensor protein                                                                                       | <i>Cyanothece</i> sp. CCY0110                                |
| 00085_4727 | 600  | 56.1  | 242  | 3.00E-62  | B7K1N7_CYAP8 | Putative uncharacterized protein                                                                     | <i>Cyanothece</i> sp. PCC 8801                               |
| 00106_0239 | 106  | 56    | 118  | 2.00E-25  | B4AUQ8_9CHRO | Putative uncharacterized protein                                                                     | <i>Cyanothece</i> sp. PCC 7822                               |
| 00107_4619 | 133  | 50.78 | 120  | 6.00E-26  | C7QYD7_CYAP0 | Putative uncharacterized protein                                                                     | <i>Cyanothece</i> sp. PCC 8802                               |
| 00168_4764 | 121  | 52.94 | 62.4 | 1.00E-08  | Q8YZW8_ANASP | All0337 protein                                                                                      | <i>Nostoc</i> sp. PCC 7120                                   |
| 00168_4765 | 61   | 57.38 | 82   | 2.00E-14  | Q8YZW7_ANASP | Asl0338 protein                                                                                      | <i>Nostoc</i> sp. PCC 7120                                   |
| 00198_4533 | 98   | 68.83 | 117  | 7.00E-25  | B4VT91_9CYAN | Putative uncharacterized protein                                                                     | <i>Coleofasciculus (Microcoleus) chthonoplastes</i> PCC 7420 |
| 00241_1042 | 200  | 52    | 224  | 4.00E-57  | B4VJL2_9CYAN | Putative uncharacterized protein                                                                     | <i>Coleofasciculus (Microcoleus) chthonoplastes</i> PCC 7420 |
| 00267_1484 | 290  | 54.12 | 266  | 1.00E-69  | A0ZCM7_NODSP | Putative uncharacterized protein                                                                     | <i>Nodularia spumigena</i> CCY9414                           |
| 00318_3317 | 170  | 61.4  | 148  | 2.00E-34  | B4VRV8_9CYAN | Putative uncharacterized protein                                                                     | <i>Coleofasciculus (Microcoleus) chthonoplastes</i> PCC 7420 |
| 00369_1660 | 75   | 57.75 | 84   | 5.00E-15  | B1XNX7_SYNP2 | Putative uncharacterized protein                                                                     | <i>Synechococcus</i> sp. PCC 7002                            |
| 00426_4242 | 287  | 65.22 | 379  | 2.00E-103 | B4W504_9CYAN | Putative uncharacterized protein                                                                     | <i>Coleofasciculus (Microcoleus) chthonoplastes</i> PCC 7420 |
| 00463_3783 | 206  | 50.62 | 93.2 | 8.00E-18  | Q55573_SYNY3 | Slr0184 protein                                                                                      | <i>Synechocystis</i> sp. PCC 6803                            |
| 00463_3787 | 202  | 53.03 | 224  | 5.00E-57  | Q110I8_TRIEI | Putative uncharacterized protein                                                                     | <i>Trichodesmium erythraeum</i> IMS101                       |
| 00465_4452 | 170  | 60.22 | 115  | 2.00E-24  | B4VRV8_9CYAN | Putative uncharacterized protein                                                                     | <i>Coleofasciculus (Microcoleus) chthonoplastes</i> PCC 7420 |
| 00536_3249 | 135  | 58.02 | 167  | 4.00E-40  | B0CB22_ACAM1 | Putative uncharacterized protein                                                                     | <i>Acaryochloris marina</i> MBIC11017                        |
| 00632_0148 | 84   | 60.24 | 120  | 4.00E-26  | A0YPF0_9CYAN | Putative uncharacterized protein                                                                     | <i>Lyngbya</i> sp. PCC 8106                                  |
| 00664_4932 | 76   | 61.84 | 100  | 4.00E-20  | A8YBV5_MICAE | Genome sequencing data, C278                                                                         | <i>Microcystis aeruginosa</i> PCC 7806                       |
| 00696_0320 | 89   | 62.86 | 107  | 5.00E-22  | Y560_SYNJB   | UPF0161 protein CYB_0560                                                                             | <i>Synechococcus</i> sp. JA-2-3B'a(2-13)                     |
| 00701_1076 | 115  | 67.29 | 174  | 2.00E-42  | Q3M559_ANAVT | Putative uncharacterized protein                                                                     | <i>Anabaena variabilis</i> ATCC 29413                        |
| 00883_3306 | 170  | 71.86 | 242  | 1.00E-62  | B4VRV8_9CYAN | Putative uncharacterized protein                                                                     | <i>Coleofasciculus (Microcoleus) chthonoplastes</i> PCC 7420 |

|            |     |       |      |           |              |                                  |                                                              |
|------------|-----|-------|------|-----------|--------------|----------------------------------|--------------------------------------------------------------|
| 00898_4415 | 209 | 55.28 | 221  | 4.00E-56  | B4VMF9_9CYAN | Putative uncharacterized protein | <i>Coleofasciculus (Microcoleus) chthonoplastes</i> PCC 7420 |
| 00917_2249 | 167 | 51.23 | 162  | 1.00E-38  | B0JQS5_MICAN | Putative uncharacterized protein | <i>Coleofasciculus (Microcoleus) aeruginosa</i> NIES-843     |
| 00919_4129 | 178 | 50.86 | 179  | 1.00E-43  | P74585_SYNY3 | Slr0668 protein                  | <i>Synechocystis</i> sp. PCC 6803                            |
| 00925_4058 | 375 | 54.08 | 108  | 1.00E-22  | A0ZIG6_NODSP | Putative uncharacterized protein | <i>Nodularia spumigena</i> CCY9414                           |
| 01051_2217 | 202 | 57.29 | 233  | 1.00E-59  | B2IZ66_NOSP7 | Putative uncharacterized protein | <i>Nostoc punctiforme</i> PCC 73102                          |
| 01054_0106 | 200 | 67.51 | 269  | 1.00E-70  | B4VJL2_9CYAN | Putative uncharacterized protein | <i>Coleofasciculus (Microcoleus) chthonoplastes</i> PCC 7420 |
| 01092_1328 | 80  | 53.12 | 74.3 | 4.00E-12  | B7K457_CYAP8 | Putative uncharacterized protein | <i>Cyanotheca</i> sp. PCC 8801                               |
| 01101_2519 | 53  | 77.55 | 86.7 | 7.00E-16  | B7K0D8_CYAP8 | Putative uncharacterized protein | <i>Cyanotheca</i> sp. PCC 8801                               |
| 01101_2520 | 136 | 51.47 | 137  | 3.00E-31  | A0YJ86_9CYAN | Putative uncharacterized protein | <i>Lyngbya</i> sp. PCC 8106                                  |
| 01124_0955 | 110 | 57.27 | 135  | 1.00E-30  | A3IXS9_9CHRO | Putative uncharacterized protein | <i>Cyanotheca</i> sp. CCY0110                                |
| 01124_0956 | 72  | 73.24 | 102  | 2.00E-20  | B2IUZ8_NOSP7 | Putative uncharacterized protein | <i>Nostoc punctiforme</i> PCC 73102                          |
| 01155_3625 | 64  | 51.11 | 57   | 6.00E-07  | B1WV08_CYAA5 | Putative uncharacterized protein | <i>Cyanotheca</i> sp. ATCC 51142                             |
| 01171_2312 | 133 | 77.59 | 193  | 2.00E-47  | B5W0E8_SPIMA | Putative uncharacterized protein | <i>Arthrospira maxima</i> CS-328                             |
| 01171_2317 | 112 | 64.86 | 153  | 6.00E-36  | B0C9W1_ACAM1 | Putative uncharacterized protein | <i>Acaryochloris marina</i> MBIC11017                        |
| 01269_2033 | 460 | 60.57 | 557  | 8.00E-157 | B7K3K4_CYAP8 | Putative uncharacterized protein | <i>Cyanotheca</i> sp. PCC 8801                               |
| 01318_2108 | 463 | 57.69 | 65.5 | 2.00E-09  | Q8YRN8_ANASP | Alr3406 protein                  | <i>Nostoc</i> sp. PCC 7120                                   |

### Domain of unknown function (DUF) proteins (15)

|        |            |     |       |     |           |              |                                    |                                                              |
|--------|------------|-----|-------|-----|-----------|--------------|------------------------------------|--------------------------------------------------------------|
| DUF29  | 00097_4303 | 147 | 53.06 | 160 | 4.00E-38  | B4VZY0_9CYAN | Conserved domain protein, putative | <i>Coleofasciculus (Microcoleus) chthonoplastes</i> PCC 7420 |
| DUF29  | 00128_4517 | 155 | 54.68 | 150 | 5.00E-35  | B4VTS1_9CYAN | Conserved domain protein, putative | <i>Coleofasciculus (Microcoleus) chthonoplastes</i> PCC 7420 |
| DUF29  | 00136_0657 | 147 | 55.24 | 156 | 6.00E-37  | B4VZY0_9CYAN | Conserved domain protein, putative | <i>Coleofasciculus (Microcoleus) chthonoplastes</i> PCC 7420 |
| DUF29  | 00542_5239 | 140 | 54.35 | 147 | 5.00E-34  | B2IU74_NOSP7 | Putative uncharacterized protein   | <i>Nostoc punctiforme</i> PCC 73102                          |
| DUF29  | 00556_2295 | 150 | 51.06 | 145 | 1.00E-33  | B4B870_9CHRO | Putative uncharacterized protein   | <i>Cyanotheca</i> sp. PCC 7822                               |
| DUF29  | 00791_1925 | 150 | 51.82 | 130 | 3.00E-29  | B0JSS6_MICAN | Putative uncharacterized protein   | <i>Microcystis aeruginosa</i> NIES-843                       |
| DUF99  | 00337_2025 | 194 | 62.5  | 248 | 2.00E-64  | A0YLC1_9CYAN | Putative uncharacterized protein   | <i>Lyngbya</i> sp. PCC 8106                                  |
| DUF262 | 00285_1239 | 372 | 70.43 | 534 | 7.00E-150 | B4VSD6_9CYAN | Putative uncharacterized protein   | <i>Coleofasciculus (Microcoleus) chthonoplastes</i> PCC 7420 |
| DUF488 | 00072_1969 | 205 | 50.53 | 199 | 5.00E-49  | Q2JPA8_SYNJB | Putative uncharacterized protein   | <i>Synechococcus</i> sp. JA-2-3B'a(2-13)                     |

|         |            |     |       |      |          |              |                                  |                                                              |
|---------|------------|-----|-------|------|----------|--------------|----------------------------------|--------------------------------------------------------------|
| DUF488  | 00072_1970 | 150 | 71.79 | 117  | 4.00E-25 | A0YKB1_9CYAN | Putative uncharacterized protein | <i>Lyngbya</i> sp. PCC 8106                                  |
| DUF488  | 00072_1971 | 148 | 60.78 | 71.2 | 3.00E-11 | B5W5J5_SPIMA | Putative uncharacterized protein | <i>Arthrospira maxima</i> CS-328                             |
| DUF2283 | 01103_3563 | 70  | 52.83 | 65.1 | 2.00E-09 | Q7NN51_GLOVI | Gsr0563 protein                  | <i>Gloeobacter violaceus</i>                                 |
| DUF3696 | 00285_1238 | 449 | 66.02 | 337  | 2.00E-90 | B4VSD5_9CYAN | Putative uncharacterized protein | <i>Coleofasciculus (Microcoleus) chthonoplastes</i> PCC 7420 |
| DUF4065 | 00358_4902 | 142 | 58.42 | 125  | 1.00E-27 | Q7NEI2_GLOVI | Glr3897 protein                  | <i>Gloeobacter violaceus</i>                                 |
| DUF4291 | 00344_4267 | 218 | 58.78 | 184  | 3.00E-45 | B0BYR1_ACAM1 | Putative uncharacterized protein | <i>Acaryochloris marina</i> MBIC11017                        |

### Hypothetical proteins (15)

|  |            |      |       |      |          |              |                                     |                                                              |
|--|------------|------|-------|------|----------|--------------|-------------------------------------|--------------------------------------------------------------|
|  | 00016_1750 | 170  | 78.92 | 262  | 1.00E-68 | B4VRV8_9CYAN | Putative uncharacterized protein    | <i>Coleofasciculus (Microcoleus) chthonoplastes</i> PCC 7420 |
|  | 00100_0035 | 95   | 54.74 | 123  | 6.00E-26 | Q117F5_TRIEI | Putative uncharacterized protein    | <i>Trichodesmium erythraeum</i> IMS101                       |
|  | 00209_4817 | 715  | 56.1  | 50.1 | 7.00E-05 | B8HUI7_CYAP4 | Oxidoreductase domain protein       | <i>Cyanotheca</i> sp. PCC 7425                               |
|  | 00356_1923 | 92   | 63.89 | 50.8 | 4.00E-05 | B2IW04_NOSP7 | Putative uncharacterized protein    | <i>Nostoc punctiforme</i> PCC 73102                          |
|  | 00516_5007 | 1728 | 53.85 | 51.2 | 3.00E-05 | B4B098_9CHRO | Putative phytochrome sensor protein | <i>Cyanotheca</i> sp. PCC 7822                               |
|  | 00822_0359 | 76   | 70.21 | 64.3 | 4.00E-09 | B2IW71_NOSP7 | Putative uncharacterized protein    | <i>Nostoc punctiforme</i> PCC 73102                          |
|  | 00830_3281 | 162  | 69.77 | 62.8 | 1.00E-08 | A0YJ12_9CYAN | Putative uncharacterized protein    | <i>Lyngbya</i> sp. PCC 8106                                  |
|  | 00830_3283 | 162  | 67.44 | 61.6 | 3.00E-08 | A0YJ12_9CYAN | Putative uncharacterized protein    | <i>Lyngbya</i> sp. PCC 8106                                  |
|  | 00871_2432 | 204  | 50.36 | 142  | 8.00E-33 | B4W057_9CYAN | Putative uncharacterized protein    | <i>Coleofasciculus (Microcoleus) chthonoplastes</i> PCC 7420 |
|  | 00961_3361 | 170  | 67.86 | 235  | 2.00E-60 | B4VRV8_9CYAN | Putative uncharacterized protein    | <i>Coleofasciculus (Microcoleus) chthonoplastes</i> PCC 7420 |
|  | 01017_0788 | 103  | 52.17 | 56.6 | 8.00E-07 | B4B4G3_9CHRO | Putative uncharacterized protein    | <i>Cyanotheca</i> sp. PCC 7822                               |
|  | 01109_3959 | 279  | 61.02 | 87.4 | 4.00E-16 | B4B2R3_9CHRO | Putative uncharacterized protein    | <i>Cyanotheca</i> sp. PCC 7822                               |
|  | 01226_4080 | 99   | 59.46 | 53.5 | 7.00E-06 | Q116W9_TRIEI | Putative uncharacterized protein    | <i>Trichodesmium erythraeum</i> IMS101                       |
|  | 01283_5029 | 719  | 60.78 | 65.5 | 2.00E-09 | A8YKD4_MICAE | Genome sequencing data, C323        | <i>Microcystis aeruginosa</i> PCC 7806                       |
|  | 01308_0455 | 1878 | 57.39 | 134  | 2.00E-30 | Q2JN13_SYNJB | Putative helicase                   | <i>Synechococcus</i> sp. JA-2-3B'a(2-13)                     |

### Other proteins (39)

|                                   |            |     |       |      |          |              |                                  |                                                              |
|-----------------------------------|------------|-----|-------|------|----------|--------------|----------------------------------|--------------------------------------------------------------|
| Excalibur calcium-binding domain. | 00322_3106 | 111 | 53.62 | 91.3 | 3.00E-17 | A8YLM3_MICAE | Genome sequencing data, C326     | <i>Microcystis aeruginosa</i> PCC 7806                       |
| FGE-sulfatase                     | 01179_4746 | 90  | 53.49 | 92.8 | 1.00E-17 | B4VQ60_9CYAN | Putative uncharacterized protein | <i>Coleofasciculus (Microcoleus) chthonoplastes</i> PCC 7420 |

|                                                                                                    |            |      |       |      |           |              |                                  |                                                              |
|----------------------------------------------------------------------------------------------------|------------|------|-------|------|-----------|--------------|----------------------------------|--------------------------------------------------------------|
| GAF domain protein                                                                                 | 00488_5109 | 1837 | 53.64 | 250  | 1.00E-64  | B0C2A3_ACAM1 | Sensor protein                   | <i>Acaryochloris marina</i> MBIC11017                        |
| GTP-binding protein SEC4, small G protein superfamily, and related Ras family GTP-binding proteins | 01232_0381 | 165  | 50.91 | 175  | 1.00E-42  | Q8YSQ4_ANASP | All3030 protein                  | <i>Nostoc</i> sp. PCC 7120                                   |
| Leucine-rich repeat (LRR) protein                                                                  | 00697_1991 | 1109 | 54.29 | 163  | 1.00E-38  | B2IUT6_NOSP7 | Miro domain protein              | <i>Nostoc punctiforme</i> PCC 73102                          |
| Leucine-rich repeat (LRR) protein, contains calponin homology domain                               | 00128_4520 | 1041 | 50.45 | 98.6 | 2.00E-19  | Q10Y31_TRIEI | Small GTP-binding protein        | <i>Trichodesmium erythraeum</i> IMS101                       |
| methyltransferase, FkbM family                                                                     | 01087_4784 | 175  | 51.74 | 194  | 6.00E-48  | A0YVC6_9CYAN | Putative uncharacterized protein | <i>Lyngbya</i> sp. PCC 8106                                  |
| PemK-like protein                                                                                  | 00822_0360 | 119  | 70.79 | 139  | 1.00E-31  | Q7NI95_GLOVI | Glr2288 protein                  | <i>Gloeobacter violaceus</i>                                 |
| pentapeptide repeat protein                                                                        | 00162_0528 | 1033 | 50.91 | 132  | 2.00E-29  | Q119S0_TRIEI | Pentapeptide repeat              | <i>Trichodesmium erythraeum</i> IMS101                       |
| pentapeptide repeat protein                                                                        | 00697_1984 | 506  | 53.19 | 85.1 | 5.00E-15  | B4VMN7_9CYAN | Pentapeptide repeat protein      | <i>Coleofasciculus (Microcoleus) chthonoplastes</i> PCC 7420 |
| pentapeptide repeat protein                                                                        | 01248_2638 | 740  | 56.48 | 101  | 2.00E-20  | B5W655_SPIMA | Pentapeptide repeat protein      | <i>Arthrospira maxima</i> CS-328                             |
| pentapeptide repeat protein                                                                        | 01248_2639 | 740  | 59.74 | 87.4 | 4.00E-16  | B5W655_SPIMA | Pentapeptide repeat protein      | <i>Arthrospira maxima</i> CS-328                             |
| phage uncharacterized family protein                                                               | 00050_4778 | 339  | 58.93 | 432  | 2.00E-119 | Q3M5G8_ANAVT | Putative uncharacterized protein | <i>Anabaena variabilis</i> ATCC 29413                        |
| Predicted ATP-binding protein involved in virulence                                                | 00019_4994 | 333  | 56.52 | 83.2 | 8.00E-15  | B4VLH3_9CYAN | Putative uncharacterized protein | <i>Coleofasciculus (Microcoleus) chthonoplastes</i> PCC 7420 |
| Predicted ATPase                                                                                   | 00436_5127 | 1827 | 56.25 | 111  | 3.00E-23  | B2J5V9_NOSP7 | Sensor protein                   | <i>Nostoc punctiforme</i> PCC 73102                          |
| Predicted ATPase                                                                                   | 00436_5128 | 1942 | 54.55 | 78.2 | 3.00E-13  | B9YPA1_ANAAZ | Sensor protein                   | ' <i>Nostoc azollae</i> ' 0708                               |
| Predicted ATPase                                                                                   | 00516_5008 | 2001 | 53.88 | 236  | 2.00E-60  | A3IU74_9CHRO | Sensor protein                   | <i>Cyanothece</i> sp. CCY0110                                |
| Predicted ATPase                                                                                   | 00666_1851 | 394  | 54.06 | 415  | 5.00E-114 | A8YMG4_MICAE | Similar to tr Q8YZF3 Q8YZF3      | <i>Microcystis aeruginosa</i> PCC 7806                       |
| Predicted ATPase                                                                                   | 01333_3876 | 500  | 50.5  | 446  | 3.00E-123 | Q7NEM8_GLOVI | Gll3851 protein                  | <i>Gloeobacter violaceus</i>                                 |
| Predicted carbamoyl transferase, NodU family                                                       | 00337_2029 | 615  | 67.92 | 78.2 | 3.00E-13  | Y1178_SYNY3  | Uncharacterized protein sll1178  | <i>Synechocystis</i> sp. PCC 6803                            |
| Predicted carbamoyl transferase, NodU family                                                       | 01101_2521 | 612  | 74.18 | 759  | 0.00E+00  | B4YB60_APHFL | O-carbamoyltransferase           | <i>Aphanizomenon flos-aquae</i> NH-5                         |

|                                                                               |            |      |       |     |           |              |                                                                               |                                                              |
|-------------------------------------------------------------------------------|------------|------|-------|-----|-----------|--------------|-------------------------------------------------------------------------------|--------------------------------------------------------------|
| Predicted haloacid-halidohydrolase and related hydrolases                     | 00024_0694 | 256  | 64.63 | 327 | 7.00E-88  | B8HRS0_CYAP4 | HAD-superfamily hydrolase, subfamily IA, variant 3                            | <i>Cyanothece</i> sp. PCC 7425                               |
| Predicted integral membrane protein, DUF2282                                  | 00917_2238 | 104  | 56.57 | 109 | 8.00E-23  | B0CCJ4_ACAM1 | Putative uncharacterized protein                                              | <i>Acaryochloris marina</i> MBIC11017                        |
| Predicted O-methyltransferase                                                 | 00639_4881 | 306  | 54.34 | 328 | 3.00E-88  | B7JYZ4_CYAP8 | Putative uncharacterized protein                                              | <i>Cyanothece</i> sp. PCC 8801                               |
| putative K <sup>+</sup> -dependent Na <sup>+</sup> /Ca <sup>+</sup> exchanger | 00575_1873 | 358  | 56.18 | 393 | 1.00E-107 | B4VUK0_9CYAN | Putative K <sup>+</sup> -dependent Na <sup>+</sup> /Ca <sup>+</sup> exchanger | <i>Coleofasciculus (Microcoleus) chthonoplastes</i> PCC 7420 |
| putative membrane protein, uncharacterized protein conserved in archaea       | 01113_1168 | 813  | 52.19 | 643 | 0.00E+00  | B4W3A2_9CYAN | Putative uncharacterized protein                                              | <i>Coleofasciculus (Microcoleus) chthonoplastes</i> PCC 7420 |
| regulatory protein, FmdB family                                               | 00726_1456 | 72   | 57.14 | 52  | 2.00E-05  | A0YKC6_9CYAN | Putative uncharacterized protein                                              | <i>Lyngbya</i> sp. PCC 8106                                  |
| Uncharacterized conserved protein                                             | 00394_1826 | 147  | 59.59 | 179 | 8.00E-44  | B4WJA5_9SYNE | Conserved domain protein                                                      | <i>Synechococcus</i> sp. PCC 7335                            |
| Uncharacterized conserved protein                                             | 00394_1827 | 107  | 73.68 | 142 | 9.00E-33  | B4WJA6_9SYNE | Conserved domain protein, putative                                            | <i>Synechococcus</i> sp. PCC 7335                            |
| Uncharacterized conserved protein                                             | 01408_4978 | 610  | 53.31 | 333 | 1.00E-89  | Q8YS65_ANASP | All3226 protein                                                               | <i>Nostoc</i> sp. PCC 7120                                   |
| Uncharacterized protein conserved in cyanobacteria                            | 00203_2410 | 212  | 58.49 | 266 | 1.00E-69  | A0YSQ3_9CYAN | Putative uncharacterized protein                                              | <i>Lyngbya</i> sp. PCC 8106                                  |
| Uncharacterized protein conserved in cyanobacteria                            | 00665_1267 | 260  | 56    | 247 | 8.00E-64  | B7KE70_CYAP7 | Putative uncharacterized protein                                              | <i>Cyanothece</i> sp. PCC 7424                               |
| Uncharacterized protein conserved in cyanobacteria                            | 01113_1176 | 295  | 60    | 283 | 2.00E-74  | B7K3N9_CYAP8 | Putative uncharacterized protein                                              | <i>Cyanothece</i> sp. PCC 8801                               |
| Uncharacterized protein conserved in cyanobacteria                            | 01204_2884 | 162  | 60.51 | 192 | 9.00E-48  | B4AVB9_9CHRO | Putative uncharacterized protein                                              | <i>Cyanothece</i> sp. PCC 7822                               |
| Uncharacterized protein conserved in cyanobacteria                            | 01308_0482 | 247  | 56.56 | 283 | 1.00E-74  | B4VR64_9CYAN | Putative uncharacterized protein                                              | <i>Coleofasciculus (Microcoleus) chthonoplastes</i> PCC 7420 |
| WD domain, G-beta repeat protein                                              | 00155_2444 | 1270 | 53.58 | 312 | 3.00E-83  | B4AXY5_9CHRO | WD-40 repeat protein                                                          | <i>Cyanothece</i> sp. PCC 7822                               |

|                                  |            |      |       |     |          |              |                                                      |                                                              |
|----------------------------------|------------|------|-------|-----|----------|--------------|------------------------------------------------------|--------------------------------------------------------------|
| WD domain, G-beta repeat protein | 00194_2270 | 1526 | 52.13 | 300 | 2.00E-79 | YY46_ANASP   | Uncharacterized WD repeat-containing protein alr3466 | <i>Nostoc</i> sp. PCC 7120                                   |
| WD domain, G-beta repeat protein | 00394_1818 | 706  | 51.41 | 320 | 1.00E-85 | B4W111_9CYAN | Putative uncharacterized protein                     | <i>Coleofasciculus (Microcoleus) chthonoplastes</i> PCC 7420 |

223

224

224 **Table S13. Identified BOGUAY ORFs with high similarity to cyanobacterial sequences.** The cyanobacterial match from UniProt  
 225 (68) with the lowest e-value is shown for each ORF. ORFs putatively encoding mobile elements or genes commonly transferred by  
 226 them (restriction enzymes, transposases, XisH elements, toxin/antitoxin systems, etc.) are not included; some are shown  
 227 elsewhere. UniProt reports the five best BLASTP matches above a cutoff value (E-value  $\leq 1.00E-05$ ); many of these proteins also  
 228 had high-scoring non-cyanobacterial matches.

| IMG/ER identification                                                   | BOGUAY ORF | Length | %id   | Score | e-value   | UniProt ID of match | Protein Name of match                                    | Organism name                                                |
|-------------------------------------------------------------------------|------------|--------|-------|-------|-----------|---------------------|----------------------------------------------------------|--------------------------------------------------------------|
| <b>Sensory and signal transduction proteins</b>                         |            |        |       |       |           |                     |                                                          |                                                              |
| adenylate and Guanylate cyclase catalytic domain protein                | 00024_0700 | 586    | 62.61 | 282   | 2.00E-74  | B4VJK7_9CYAN        | Adenylate and Guanylate cyclase catalytic domain protein | <i>Coleofasciculus (Microcoleus) chthonoplastes</i> PCC 7420 |
| adenylate and Guanylate cyclase catalytic domain protein                | 00391_1540 | 1805   | 50.22 | 223   | 3.00E-56  | Q110P3_TRIEI        | Adenylate/guanylate cyclase                              | <i>Trichodesmium erythraeum</i> IMS101                       |
| adenylate and Guanylate cyclase catalytic domain protein                | 00962_4708 | 1805   | 55.06 | 341   | 5.00E-92  | Q110P3_TRIEI        | Adenylate/guanylate cyclase                              | <i>Trichodesmium erythraeum</i> IMS101                       |
| adenylate and Guanylate cyclase catalytic domain protein                | 01034_3367 | 352    | 63.08 | 429   | 6.00E-118 | B5WA99_SPIMA        | Adenylate/guanylate cyclase                              | <i>Arthrospira maxima</i> CS-328                             |
| Adenylate cyclase, family 3 (some proteins contain HAMP domain)         | 00231_3849 | 1119   | 55.17 | 85.1  | 2.00E-15  | Q111B1_TRIEI        | Adenylate/guanylate cyclase                              | <i>Trichodesmium erythraeum</i> IMS101                       |
| Adenylate/guanylate kinase                                              | 01074_4351 | 744    | 53.12 | 224   | 1.00E-56  | Q10W13_TRIEI        | Adenylate/guanylate cyclase                              | <i>Trichodesmium erythraeum</i> IMS101                       |
| ATPase, histidine kinase-, DNA gyrase B-, and HSP90-like domain protein | 00948_1635 | 1875   | 56.11 | 386   | 4.00E-105 | B4VQ57_9CYAN        | Sensor protein                                           | <i>Coleofasciculus (Microcoleus) chthonoplastes</i> PCC 7420 |
| ATPase, histidine kinase-, DNA gyrase B-, and HSP90-like domain protein | 00961_3363 | 424    | 57.04 | 306   | 2.00E-81  | B0C2A5_ACAM1        | Sensor protein                                           | <i>Acaryochloris marina</i> MBIC11017                        |
| ATPase, histidine kinase-, DNA gyrase B-, and HSP90-like domain protein | 01017_0784 | 1660   | 51.02 | 457   | 1.00E-126 | B0C8M6_ACAM1        | Sensor protein                                           | <i>Acaryochloris marina</i> MBIC11017                        |

|                                                                              |            |      |       |      |           |              |                                  |                                                              |
|------------------------------------------------------------------------------|------------|------|-------|------|-----------|--------------|----------------------------------|--------------------------------------------------------------|
| ATPase, histidine kinase-, DNA gyrase B-, and HSP90-like domain protein      | 01054_0100 | 974  | 57.26 | 666  | 0.00E+00  | B4W013_9CYAN | PAS fold family                  | <i>Coleofasciculus (Microcoleus) chthonoplastes</i> PCC 7420 |
| ATPase, histidine kinase-, DNA gyrase B-, and HSP90-like domain protein      | 01074_4353 | 280  | 56.36 | 307  | 8.00E-82  | B5W6J4_SPIMA | Sensor protein                   | <i>Arthrospira maxima</i> CS-328                             |
| ATPase, histidine kinase-, DNA gyrase B-, and HSP90-like domain protein      | 01245_5106 | 421  | 55.34 | 272  | 3.00E-71  | B0C8M5_ACAM1 | Sensor protein                   | <i>Acaryochloris marina</i> MBIC11017                        |
| ATPase, histidine kinase-, DNA gyrase B-, and HSP90-like domain protein      | 01285_3956 | 421  | 53.94 | 276  | 1.00E-72  | B0C8M5_ACAM1 | Sensor protein                   | <i>Acaryochloris marina</i> MBIC11017                        |
| ATPase, histidine kinase-, DNA gyrase B-, and HSP90-like domain protein      | 01308_0467 | 1119 | 51.62 | 1077 | 0.00E+00  | Q111B1_TRIEI | Adenylate/guanylate cyclase      | <i>Trichodesmium erythraeum</i> IMS101                       |
| histidine kinase A domain protein                                            | 00301_1142 | 750  | 50.39 | 120  | 4.00E-26  | Q10X63_TRIEI | Sensor protein                   | <i>Trichodesmium erythraeum</i> IMS101                       |
| PAS domain S-box                                                             | 00470_1304 | 878  | 50.43 | 331  | 2.00E-88  | B4W0L0_9CYAN | Putative uncharacterized protein | <i>Coleofasciculus (Microcoleus) chthonoplastes</i> PCC 7420 |
| Response regulator containing a CheY-like receiver domain and a GGDEF domain | 00697_1997 | 437  | 71.01 | 108  | 2.00E-22  | B9YKK5_ANAAZ | Sensor protein                   | ' <i>Nostoc azollae</i> ' 0708                               |
| response regulator receiver domain protein                                   | 00024_0680 | 145  | 61.72 | 168  | 1.00E-40  | A0YM57_9CYAN | Two-component response regulator | <i>Lyngbya</i> sp. PCC 8106                                  |
| response regulator receiver domain protein                                   | 00024_0682 | 888  | 57.93 | 184  | 3.00E-45  | B0C2H4_ACAM1 | Sensor protein                   | <i>Acaryochloris marina</i> MBIC11017                        |
| response regulator receiver domain protein                                   | 00478_0855 | 129  | 57.36 | 171  | 2.00E-41  | A3IHA5_9CHRO | Two-component response regulator | <i>Cyanotheca</i> sp. CCY0110                                |
| response regulator receiver domain protein                                   | 00948_1638 | 131  | 63.41 | 173  | 4.00E-42  | B4VQ56_9CYAN | Putative uncharacterized protein | <i>Coleofasciculus (Microcoleus) chthonoplastes</i> PCC 7420 |
| response regulator receiver domain protein                                   | 01034_3366 | 125  | 70.25 | 179  | 8.00E-44  | A0YPA4_9CYAN | Two-component response regulator | <i>Lyngbya</i> sp. PCC 8106                                  |
| Sensory transduction histidine kinase                                        | 00470_1295 | 459  | 55.47 | 448  | 1.00E-123 | B4W249_9CYAN | PAS fold family                  | <i>Coleofasciculus (Microcoleus) chthonoplastes</i> PCC 7420 |



|                                                                                                 |            |      |       |     |           |              |                                                                                                      |                                                              |
|-------------------------------------------------------------------------------------------------|------------|------|-------|-----|-----------|--------------|------------------------------------------------------------------------------------------------------|--------------------------------------------------------------|
| Serine/threonine protein kinase                                                                 | 00291_5252 | 1830 | 63.78 | 239 | 7.00E-62  | B4VIF3_9CYAN | Adenylate and Guanylate cyclase catalytic domain protein                                             | <i>Coleofasciculus (Microcoleus) chthonoplastes</i> PCC 7420 |
| Serine/threonine protein kinase                                                                 | 00676_3755 | 2361 | 52.48 | 989 | 0.00E+00  | Q3M1D8_ANAVT | Serine/threonine protein kinase and signal transduction histidine kinase with GAF and PAS/PAC sensor | <i>Anabaena variabilis</i> ATCC 29413                        |
| Serine/threonine protein kinase                                                                 | 00962_4709 | 1830 | 64.13 | 285 | 3.00E-75  | B4VIF3_9CYAN | Adenylate and Guanylate cyclase catalytic domain protein                                             | <i>Coleofasciculus (Microcoleus) chthonoplastes</i> PCC 7420 |
| Serine/threonine protein kinase                                                                 | 01127_5053 | 1830 | 63.04 | 318 | 4.00E-85  | B4VIF3_9CYAN | Adenylate and Guanylate cyclase catalytic domain protein                                             | <i>Coleofasciculus (Microcoleus) chthonoplastes</i> PCC 7420 |
| Serine/threonine specific protein phosphatase involved in glycogen accumulation, PP2A-related   | 00406_3932 | 872  | 55.72 | 363 | 2.00E-98  | B4WKD5_9SYNE | Ser/Thr protein phosphatase family protein                                                           | <i>Synechococcus</i> sp. PCC 7335                            |
| Signal transduction histidine kinase                                                            | 00024_0678 | 1875 | 58.77 | 437 | 3.00E-120 | B4VQ57_9CYAN | Sensor protein                                                                                       | <i>Coleofasciculus (Microcoleus) chthonoplastes</i> PCC 7420 |
| Signal transduction histidine kinase                                                            | 00024_0681 | 1875 | 59.59 | 383 | 3.00E-104 | B4VQ57_9CYAN | Sensor protein                                                                                       | <i>Coleofasciculus (Microcoleus) chthonoplastes</i> PCC 7420 |
| Signal transduction histidine kinase                                                            | 00093_4605 | 857  | 51.93 | 432 | 7.00E-119 | B4AZE6_9CHRO | Sensor protein                                                                                       | <i>Cyanothece</i> sp. PCC 7822                               |
| Signal transduction histidine kinase                                                            | 00697_1995 | 2724 | 66.04 | 142 | 3.00E-32  | B4VXY3_9CYAN | Sensor protein                                                                                       | <i>Coleofasciculus (Microcoleus) chthonoplastes</i> PCC 7420 |
| Predicted ATPase                                                                                | 00837_5334 | 1728 | 59.39 | 203 | 5.00E-51  | B4B098_9CHRO | Putative phytochrome sensor protein (ser-thr kinase by PSI-BLAST - BM)                               | <i>Cyanothece</i> sp. PCC 7822                               |
| <b>Cell wall biogenesis, membrane production, and possible chromosome partitioning proteins</b> |            |      |       |     |           |              |                                                                                                      |                                                              |
| Glycosyltransferases involved in cell wall biogenesis                                           | 00034_4585 | 325  | 63.38 | 445 | 4.00E-123 | A8YNB5_MICAE | Genome sequencing data, C328                                                                         | <i>Microcystis aeruginosa</i> PCC 7806                       |
| Glycosyltransferases involved in cell wall biogenesis                                           | 00359_2116 | 385  | 53.64 | 122 | 9.00E-27  | B8HUG1_CYAP4 | Glycosyl transferase family 2                                                                        | <i>Cyanothece</i> sp. PCC 7425                               |
| Glycosyltransferases involved in cell wall biogenesis                                           | 00388_3714 | 160  | 56.67 | 155 | 1.00E-36  | B1WVH2_CYAA5 | Glycosyl transferase, group 2                                                                        | <i>Cyanothece</i> sp. ATCC 51142                             |
| Predicted polypeptide N-acetylgalactosaminyltransferase                                         | 00138_2549 | 703  | 53.78 | 286 | 5.00E-75  | B7K809_CYAP7 | Glycosyl transferase family 2                                                                        | <i>Cyanothece</i> sp. PCC 7424                               |

|                                                                                                                                  |            |      |       |     |           |              |                                                                                                                                                                                                   |                                        |
|----------------------------------------------------------------------------------------------------------------------------------|------------|------|-------|-----|-----------|--------------|---------------------------------------------------------------------------------------------------------------------------------------------------------------------------------------------------|----------------------------------------|
| Predicted pyridoxal phosphate-dependent enzyme apparently involved in regulation of cell wall biogenesis                         | 00267_1479 | 383  | 68.94 | 172 | 8.00E-42  | B2IYK0_NOSP7 | DegT/DnrJ/EryC1/StrS aminotransferase                                                                                                                                                             | <i>Nostoc punctiforme</i> PCC 73102    |
| Predicted pyridoxal phosphate-dependent enzyme apparently involved in regulation of cell wall biogenesis                         | 00267_1480 | 383  | 56.91 | 282 | 2.00E-74  | B2IYK0_NOSP7 | DegT/DnrJ/EryC1/StrS aminotransferase                                                                                                                                                             | <i>Nostoc punctiforme</i> PCC 73102    |
| peptidase, M23 family                                                                                                            | 00938_0730 | 338  | 54.17 | 131 | 2.00E-28  | Q05SU0_9SYNE | Peptidoglycan-binding LysM                                                                                                                                                                        | <i>Synechococcus</i> sp. RS9916        |
| glycosyltransferase, group 1 family protein, phosphatidylinositol biosynthesis/Sulfolipid synthase                               | 00904_5273 | 362  | 51.83 | 196 | 1.00E-48  | Q6ZET2_SYNY3 | SlI5048 protein                                                                                                                                                                                   | <i>Synechocystis</i> sp. PCC 6803      |
| N-acetylglucosaminyltransferase complex, subunit PIG-A/SPT14, required for phosphatidylinositol biosynthesis/Sulfolipid synthase | 00905_5269 | 362  | 50.51 | 104 | 3.00E-21  | Q6ZET2_SYNY3 | SlI5048 protein                                                                                                                                                                                   | <i>Synechocystis</i> sp. PCC 6803      |
| oxidoreductase, 2-nitropropane dioxygenase family protein                                                                        | 00286_0602 | 554  | 68.92 | 729 | 0.00E+00  | A0ZCD7_NODSP | 2-nitropropane dioxygenase, NPD (according to pfam, now called nitronate monooxygenase; in SEED however it is Enoyl-[acyl-carrier-protein] reductase [FMN] (EC 1.3.1.9), inferred for PFA pathway | <i>Nodularia spumigena</i> CCY9414     |
| phosphopantetheine attachment domain protein                                                                                     | 00430_5228 | 3242 | 59.09 | 114 | 2.00E-24  | B2IXJ9_NOSP7 | Amino acid adenylation domain protein                                                                                                                                                             | <i>Nostoc punctiforme</i> PCC 73102    |
| Myo-inositol-1-phosphate synthase                                                                                                | 01069_2501 | 367  | 75.55 | 585 | 2.00E-165 | B0C6C6_ACAM1 | Myo-inositol-1-phosphate synthase                                                                                                                                                                 | <i>Acaryochloris marina</i> MBIC11017  |
| CobQ/CobB/MinD/ParA nucleotide binding domain protein                                                                            | 01124_0945 | 449  | 52.24 | 448 | 5.00E-124 | B1XNZ9_SYNP2 | Chromosome partitioning protein, ParA ATPase family                                                                                                                                               | <i>Synechococcus</i> sp. PCC 7002      |
| CobQ/CobB/MinD/ParA nucleotide binding domain protein (ATPases involved in chromosome partitioning)                              | 00037_3952 | 354  | 50.71 | 349 | 3.00E-94  | B5W8M8_SPIMA | Cobyrinic acid ac-diamide synthase                                                                                                                                                                | <i>Arthrospira maxima</i> CS-328       |
| <b>Transport proteins</b>                                                                                                        |            |      |       |     |           |              |                                                                                                                                                                                                   |                                        |
| ABC-type Mn/Zn transport systems, ATPase component                                                                               | 00016_1762 | 289  | 54.47 | 279 | 2.00E-73  | P73086_SYNY3 | ABC transporter                                                                                                                                                                                   | <i>Synechocystis</i> sp. PCC 6803      |
| ABC-type Mn <sup>2+</sup> /Zn <sup>2+</sup> transport systems, permease components                                               | 00016_1763 | 276  | 63.1  | 314 | 7.00E-84  | B0JY65_MICAN | ABC-3 transport family protein                                                                                                                                                                    | <i>Microcystis aeruginosa</i> NIES-843 |

|                                                                                                                                                             |            |      |       |      |           |              |                                                          |                                                                                    |
|-------------------------------------------------------------------------------------------------------------------------------------------------------------|------------|------|-------|------|-----------|--------------|----------------------------------------------------------|------------------------------------------------------------------------------------|
| putative ferrous iron transport protein A                                                                                                                   | 01185_3408 | 211  | 60.81 | 99.4 | 1.00E-19  | B0JLG8_MICAN | Ferrous iron transport protein A                         | <i>Microcystis aeruginosa</i><br>NIES-843                                          |
| ferrous iron transport protein B                                                                                                                            | 01185_3407 | 774  | 59.06 | 909  | 0.00E+00  | B0JLG7_MICAN | Ferrous iron transport protein B                         | <i>Microcystis aeruginosa</i><br>NIES-843                                          |
| putative K <sup>+</sup> -dependent Na <sup>+</sup> /Ca <sup>+</sup> -exchanger                                                                              | 00575_1873 | 367  | 54.27 | 388  | 5.00E-106 | B7KDB9_CYAP7 | Na <sup>+</sup> /Ca <sup>+</sup> antiporter, CaCA family | <i>Cyanothece</i> sp. PCC 7424                                                     |
| putative K <sup>+</sup> -dependent Na <sup>+</sup> /Ca <sup>+</sup> -exchanger                                                                              | 00632_0121 | 374  | 50.96 | 105  | 1.00E-21  | C7QRB7_CYAP0 | Sensor protein                                           | <i>Cyanothece</i> sp. PCC 8802                                                     |
| transporter, divalent anion:Na <sup>+</sup> symporter (DASS) family protein                                                                                 | 00344_4265 | 461  | 50.42 | 470  | 2.00E-130 | B4W1Y8_9CYAN | Transporter, DASS family                                 | <i>Coleofasciculus</i><br>( <i>Microcoleus</i> )<br><i>chthonoplastes</i> PCC 7420 |
| Predicted membrane protein involved in D-alanine export; Acyltransferase required for palmitoylation of Hedgehog (Hh) family of secreted signaling proteins | 00300_4486 | 495  | 51.44 | 382  | 4.00E-104 | Q7NM22_GLOVI | Alginate O-acetylation protein                           | <i>Gloeobacter violaceus</i>                                                       |
| multidrug resistance protein, SMR family                                                                                                                    | 00103_3279 | 106  | 54.9  | 122  | 2.00E-26  | Q8Z018_ANASP | Multidrug exporter                                       | <i>Nostoc</i> sp. PCC 7120                                                         |
| <b>Possible secondary metabolite production proteins</b>                                                                                                    |            |      |       |      |           |              |                                                          |                                                                                    |
| AMP-binding enzyme; Non-ribosomal peptide synthetase modules and related proteins; Acyl-CoA synthetase                                                      | 00450_4350 | 1098 | 60.71 | 564  | 2.00E-158 | B0JJX1_MICAN | McnA protein                                             | <i>Microcystis aeruginosa</i><br>NIES-843                                          |
| beta-ketoacyl synthase, N-terminal domain protein                                                                                                           | 01230_4663 | 2206 | 57.02 | 409  | 2.00E-112 | D2JNV9_9NOSO | Cis-AT polyketide synthase                               | <i>Nostoc</i> sp. 'Peltigera membranacea cyanobiont'                               |
| glycosyl hydrolase family 3 N-terminal domain protein                                                                                                       | 00984_4621 | 140  | 69.66 | 141  | 2.00E-32  | B1X1W0_CYAA5 | Putative uncharacterized protein                         | <i>Cyanothece</i> sp. ATCC 51142                                                   |
| hydantoinase B/oxoprolinase                                                                                                                                 | 00342_3374 | 1215 | 56.89 | 528  | 5.00E-148 | B4WH03_9SYNE | Hydantoinase/oxoprolinase domain family protein          | <i>Synechococcus</i> sp. PCC 7335                                                  |
| N-methylhydantoinase B/acetone carboxylase, alpha subunit                                                                                                   | 00342_3373 | 519  | 64.71 | 75.5 | 2.00E-12  | B4B8A0_9CHRO | 5-oxoprolinase (ATP-hydrolyzing)                         | <i>Cyanothece</i> sp. PCC 7822                                                     |
| PfaB family protein                                                                                                                                         | 00286_0603 | 1556 | 53.52 | 1491 | 0.00E+00  | A0ZFX9_NODSP | Beta-ketoacyl synthase                                   | <i>Nodularia spumigena</i><br>CCY9414                                              |
| Polyketide synthase modules and related proteins                                                                                                            | 00241_1056 | 2206 | 54.33 | 632  | 6.00E-179 | D2JNV9_9NOSO | Cis-AT polyketide synthase                               | <i>Nostoc</i> sp. 'Peltigera membranacea cyanobiont'                               |
| Polyketide synthase modules and related proteins                                                                                                            | 00971_2005 | 575  | 52.93 | 600  | 3.00E-169 | B2J2F2_NOSP7 | KR                                                       | <i>Nostoc punctiforme</i> PCC 73102                                                |

|                                                          |            |      |       |      |          |              |                                               |                                                                                    |
|----------------------------------------------------------|------------|------|-------|------|----------|--------------|-----------------------------------------------|------------------------------------------------------------------------------------|
| polyketide-type polyunsaturated fatty acid synthase PfaA | 00971_2006 | 1735 | 54.61 | 1374 | 0.00E+00 | A0ZFX6_NODSP | Heterocyst glycolipid synthase                | <i>Nodularia spumigena</i><br>CCY9414                                              |
| putative linear gramicidin synthetase LgrC               | 00172_4829 | 4458 | 51.1  | 265  | 4.00E-69 | B2IXJ7_NOSP7 | Amino acid adenylation domain protein         | <i>Nostoc punctiforme</i> PCC<br>73102                                             |
| putative tyrocidine synthetase TycC                      | 00780_1591 | 1298 | 50.93 | 1150 | 0.00E+00 | B5STA6_OSCAG | OciC (Fragment)                               | <i>Planktothrix agardhii</i> NIES-<br>205                                          |
| ornithine cyclodeaminase/mu-crystallin family protein    | 00100_0036 | 350  | 50.74 | 358  | 6.00E-97 | B4VZM8_9CYAN | Ornithine cyclodeaminase/mu-crystallin family | <i>Coleofasciculus</i><br>( <i>Microcoleus</i> )<br><i>chthonoplastes</i> PCC 7420 |

**Other proteins**

|                                                                     |            |     |       |      |           |              |                                                     |                                                                                    |
|---------------------------------------------------------------------|------------|-----|-------|------|-----------|--------------|-----------------------------------------------------|------------------------------------------------------------------------------------|
| 4-hydroxybenzoate synthetase (chorismate lyase)                     | 01073_4016 | 110 | 62.62 | 143  | 6.00E-33  | B4B8N0_9CHRO | Putative uncharacterized protein                    | <i>Cyanothece</i> sp. PCC 7822                                                     |
| Adenylylsulfate kinase and related kinases                          | 01034_3365 | 205 | 65.33 | 277  | 5.00E-73  | CYSC_ACAM1   | Adenylyl-sulfate kinase                             | <i>Acaryochloris marina</i><br>MBIC11017                                           |
| ADP-ribosylglycohydrolase family protein                            | 00150_0826 | 268 | 66.44 | 197  | 2.00E-49  | B9YPM5_ANAAZ | ADP-ribosylation/Crystallin J1                      | ' <i>Nostoc azollae</i> ' 0708                                                     |
| Amidohydrolase                                                      | 00199_2709 | 390 | 62.07 | 454  | 7.00E-126 | B8HUF9_CYAP4 | Amidohydrolase 2                                    | <i>Cyanothece</i> sp. PCC 7425                                                     |
| aspartate racemase                                                  | 00162_0519 | 265 | 55.42 | 280  | 1.00E-73  | B5VZU3_SPIMA | Aspartate racemase                                  | <i>Arthrospira maxima</i> CS-328                                                   |
| Cysteine synthase                                                   | 00100_0038 | 340 | 56.01 | 369  | 3.00E-100 | B4VZM9_9CYAN | Cysteine synthase                                   | <i>Coleofasciculus</i><br>( <i>Microcoleus</i> )<br><i>chthonoplastes</i> PCC 7420 |
| Dimethylglycine N-methyltransferase                                 | 00162_0520 | 553 | 53.51 | 301  | 7.00E-80  | A0YIB3_9CYAN | Putative glycine-sarcosine methyltransferase        | <i>Lyngbya</i> sp. PCC 8106                                                        |
| Dimethylglycine N-methyltransferase                                 | 00360_3387 | 277 | 60.53 | 340  | 7.00E-92  | Q83WC3_APHHA | Dimethylglycine N-methyltransferase                 | <i>Aphanothece halophytica</i>                                                     |
| ATPase family associated with various cellular activities (AAA)     | 00338_4328 | 238 | 70.21 | 139  | 2.00E-31  | B4W316_9CYAN | Putative uncharacterized protein                    | <i>Coleofasciculus</i><br>( <i>Microcoleus</i> )<br><i>chthonoplastes</i> PCC 7420 |
| ATPase family associated with various cellular activities (AAA)     | 00356_1916 | 320 | 62.3  | 369  | 2.00E-100 | B0C9T9_ACAM1 | Methanol dehydrogenase regulatory protein, putative | <i>Acaryochloris marina</i><br>MBIC11017                                           |
| Predicted ATPase                                                    | 00959_5086 | 382 | 63.47 | 283  | 9.00E-75  | C7QR95_CYAP0 | ATPase-like protein                                 | <i>Cyanothece</i> sp. PCC 8802                                                     |
| dihydroorotase, homodimeric type                                    | 01054_0074 | 345 | 64.5  | 448  | 5.00E-124 | PYRC_ACAM1   | Dihydroorotase                                      | <i>Acaryochloris marina</i><br>MBIC11017                                           |
| Fe-S oxidoreductase                                                 | 00162_0524 | 516 | 51.92 | 333  | 1.00E-89  | Q10WJ6_TRIEI | Radical SAM                                         | <i>Trichodesmium erythraeum</i><br>IMS101                                          |
| conserved domain protein                                            | 00162_0525 | 516 | 57.32 | 207  | 4.00E-52  | Q10WJ6_TRIEI | Radical SAM                                         | <i>Trichodesmium erythraeum</i><br>IMS101                                          |
| Fe-S oxidoreductase                                                 | 00162_0526 | 516 | 53.69 | 554  | 8.00E-156 | Q10WJ6_TRIEI | Radical SAM                                         | <i>Trichodesmium erythraeum</i><br>IMS101                                          |
| GMC oxidoreductase (Glucose-methanol-choline oxidoreductase family) | 01079_5157 | 472 | 58.97 | 50.1 | 8.00E-05  | B5W9M6_SPIMA | Glucose-methanol-choline oxidoreductase             | <i>Arthrospira maxima</i> CS-328                                                   |
| oxidoreductase, zinc-binding dehydrogenase family protein           | 01124_0941 | 319 | 56.88 | 337  | 1.00E-90  | B4W230_9CYAN | Alcohol dehydrogenase GroES-like domain family      | <i>Coleofasciculus</i><br>( <i>Microcoleus</i> )<br><i>chthonoplastes</i> PCC 7420 |

|                                                         |            |      |       |      |           |              |                                                                 |                                                              |
|---------------------------------------------------------|------------|------|-------|------|-----------|--------------|-----------------------------------------------------------------|--------------------------------------------------------------|
| Flagellar motor protein OmpA                            | 01009_5001 | 215  | 50.31 | 125  | 3.00E-27  | Q3MC14_ANAVT | Putative uncharacterized protein                                | <i>Anabaena variabilis</i> ATCC 29413                        |
| gamma-glutamyltranspeptidase                            | 00696_0298 | 472  | 57.5  | 263  | 2.00E-68  | Q4BU94_CROWT | Gamma-glutamyltranspeptidase (Fragment)                         | <i>Crocospaera watsonii</i> WH 8501                          |
| GDP-mannose 4,6-dehydratase                             | 01226_4081 | 363  | 79.06 | 600  | 1.00E-169 | Q5N5L7_SYNP6 | GDP-mannose 4,6-dehydratase                                     | <i>Synechococcus elongatus</i> PCC 6301                      |
| glycogen/starch synthases, ADP-glucose type             | 00241_1024 | 491  | 65.44 | 667  | 0.00E+00  | B4AUH6_9CHRO | Glycogen/starch synthase, ADP-glucose type                      | <i>Cyanothece</i> sp. PCC 7822                               |
| Heparan sulfate D-glucosaminyl 3-O-sulfotransferase     | 00397_1672 | 309  | 51.13 | 303  | 2.00E-80  | B7KBX2_CYAP7 | Sulfotransferase                                                | <i>Cyanothece</i> sp. PCC 7424                               |
| Heparan sulfate D-glucosaminyl 3-O-sulfotransferase     | 00397_1674 | 298  | 51.85 | 310  | 1.00E-82  | B4B416_9CHRO | Sulfotransferase                                                | <i>Cyanothece</i> sp. PCC 7822                               |
| Protein-tyrosine sulfotransferase TPST1/TPST2           | 00847_4028 | 320  | 51.05 | 293  | 1.00E-77  | B7KGL5_CYAP7 | Sulfotransferase                                                | <i>Cyanothece</i> sp. PCC 7424                               |
| Uncharacterized conserved protein, Nitro_FeMo-Co        | 00301_1138 | 130  | 53.6  | 139  | 7.00E-32  | B4VK95_9CYAN | Dinitrogenase iron-molybdenum cofactor, putative                | <i>Coleofasciculus (Microcoleus) chthonoplastes</i> PCC 7420 |
| molybdenum cofactor biosynthesis protein B              | 00478_0861 | 195  | 65.12 | 238  | 2.00E-61  | Q4C4T4_CROWT | Molybdenum cofactor biosynthesis protein                        | <i>Crocospaera watsonii</i> WH 8501                          |
| NAD(P)(+) transhydrogenase (AB-specific), alpha subunit | 00327_3230 | 538  | 66.15 | 694  | 0.00E+00  | B0CDX4_ACAM1 | NAD(P) transhydrogenase, alpha subunit                          | <i>Acaryochloris marina</i> MBIC11017                        |
| peptide deformylase                                     | 01181_3853 | 179  | 52.3  | 192  | 1.00E-47  | Q3M2X2_ANAVT | Peptide deformylase                                             | <i>Anabaena variabilis</i> ATCC 29413                        |
| Phosphoenolpyruvate carboxykinase (ATP)                 | 00100_0013 | 633  | 60.16 | 790  | 0.00E+00  | B0JW12_MICAN | Putative uncharacterized protein                                | <i>Microcystis aeruginosa</i> NIES-843                       |
| phosphoglucomutase                                      | 00138_2548 | 544  | 68.75 | 783  | 0.00E+00  | B7JZ50_CYAP8 | Phosphoglucomutase/phosphomannomutase alpha/beta/alpha domain I | <i>Cyanothece</i> sp. PCC 8801                               |
| phosphopantetheine attachment domain protein            | 00430_5228 | 3242 | 59.09 | 114  | 2.00E-24  | B2IXJ9_NOSP7 | Amino acid adenylation domain protein                           | <i>Nostoc punctiforme</i> PCC 73102                          |
| Predicted transcriptional regulator                     | 00696_0316 | 127  | 57.89 | 131  | 2.00E-29  | B4VNB4_9CYAN | Putative uncharacterized protein                                | <i>Coleofasciculus (Microcoleus) chthonoplastes</i> PCC 7420 |
| putative transcriptional regulator, PvullC              | 00125_3718 | 78   | 52.94 | 76.6 | 8.00E-13  | B4AWI0_9CHRO | Transcriptional regulator, XRE family                           | <i>Cyanothece</i> sp. PCC 7822                               |
| short chain dehydrogenase                               | 00906_2610 | 657  | 52.02 | 664  | 0.00E+00  | A3IU6_9CHRO  | Short chain dehydrogenase                                       | <i>Cyanothece</i> sp. CCY0110                                |
| retroviral aspartyl protease                            | 00266_3919 | 55   | 57.14 | 60.1 | 1.00E-07  | B4VXN4_9CYAN | Putative uncharacterized protein                                | <i>Coleofasciculus (Microcoleus) chthonoplastes</i> PCC 7420 |
| Subtilisin-related protease/Vacuolar protease B         | 00384_3830 | 1344 | 53.15 | 390  | 2.00E-106 | B4VZU0_9CYAN | Cna protein B-type domain                                       | <i>Coleofasciculus (Microcoleus)</i>                         |

|                                                     |            |      |       |     |           |              |                                                    |  |                                        |
|-----------------------------------------------------|------------|------|-------|-----|-----------|--------------|----------------------------------------------------|--|----------------------------------------|
|                                                     |            |      |       |     |           |              |                                                    |  | <i>chthonoplastes</i> PCC 7420         |
| Subtilisin-related protease/Vacuolar protease B     | 00384_3831 | 2534 | 52.33 | 389 | 9.00E-106 | B0JT18_MICAN | Putative peptidase                                 |  | <i>Microcystis aeruginosa</i> NIES-843 |
| UDP-glucose 4-epimerase/UDP-sulfoquinovose synthase | 00665_1257 | 400  | 72.73 | 601 | 4.00E-170 | B1XII0_SYNP2 | NAD dependent epimerase/dehydratase family protein |  | <i>Synechococcus</i> sp. PCC 7002      |

230

231 SUPPLEMENTAL REFERENCES

- 232 1. **Salman V, Amann R, Girnth AC, Polerecky L, Bailey JV, Hogslund S,**  
233 **Jessen G, Pantoja S, Schulz-Vogt HN.** 2011. A single-cell sequencing  
234 approach to the classification of large, vacuolated sulfur bacteria. *Systematic*  
235 *and Applied Microbiology* **34**:243-259.
- 236 2. **McKay LJ, MacGregor BJ, Biddle JF, Albert DB, Mendlovitz HP, Hoer DR,**  
237 **Lipp JS, Lloyd KG, Teske AP.** 2012. Spatial heterogeneity and underlying  
238 geochemistry of phylogenetically diverse orange and white *Beggiatoa* mats in  
239 Guaymas Basin hydrothermal sediments. *Deep-Sea Research I* **67**:21-31.
- 240 3. **Ludwig W, Strunk O, Westram R, Richter L, Meier H, Yadhukumar,**  
241 **Buchner A, Lai T, Steppi S, Jobb G, Förster W, Brettske I, Gerber S,**  
242 **Ginhart AW, Gross O, Grumann S, Hermann S, Jost R, König A, Liss T,**  
243 **Lüßmann R, May M, Nonhoff B, Reichel B, Strehlow R, Stamatakis A,**  
244 **Stuckmann N, Vilbig A, Lenke M, Ludwig T, Bode A, Schleifer K-H.** 2004.  
245 ARB: a software environment for sequence data. *Nucleic Acids Research*  
246 **32**:1363-1371.
- 247 4. **Jukes TH, Cantor CR.** 1969. Evolution of protein molecules, p. 21-132. *In*  
248 Munro HN (ed.), *Mammalian Protein Metabolism*, vol. III. Academic Press,  
249 New York.
- 250 5. **Hinck S, Mußmann M, Salman V, Neu TR, Lenk S, de Beer D, Jonkers HM.**  
251 2011. Vacuolated *Beggiatoa*-like filaments from different hypersaline  
252 environments form a novel genus. *Environmental Microbiology* **13**:3194-  
253 3205.
- 254 6. **Stamatakis A.** 2006. RAxML-VI-HPC: Maximum likelihood-based  
255 phylogenetic analyses with thousands of taxa and mixed models.  
256 *Bioinformatics* **22**:2688-2690.
- 257 7. **Tamura K, Peterson D, Peterson N, Stecher G, Nei M, Kumar S.** 2011.  
258 MEGA5: Molecular Evolutionary Genetics Analysis using maximum  
259 likelihood, evolutionary distance, and maximum parsimony methods.  
260 *Molecular Biology and Evolution* **28**:2731-2739.
- 261 8. **Edgar RC.** 2004. MUSCLE: multiple sequence alignment with high accuracy  
262 and high throughput. *Nucleic Acids Research* **32**:1792-1797.
- 263 9. **Ronquist F, Teslenko M, van der Mark P, Ayres DL, Darling A, Hohna S,**  
264 **Larget B, Liu L, Suchard MA, Huelsenbeck JP.** 2012. MrBayes 3.2: Efficient  
265 Bayesian phylogenetic inference and model choice across a large model  
266 space. *Systematic Biology* **61**:539-542.
- 267 10. **Yang ZH.** 1996. Among-site rate variation and its impact on phylogenetic  
268 analyses. *Trends in Ecology & Evolution* **11**:367-372.
- 269 11. **Adachi J, Waddell PJ, Martin W, Hasegawa M.** 2000. Plastid genome  
270 phylogeny and a model of amino acid substitution for proteins encoded by  
271 chloroplast DNA. *Journal of Molecular Evolution* **50**:348-358.
- 272 12. **Saitou N, Nei M.** 1987. The neighbor-joining method: a new method for  
273 reconstructing phylogenetic trees. *Molecular Biology and Evolution* **4**:406-  
274 425.



- 275 13. **Felsenstein J.** 1985. Confidence limits on phylogenies: an approach using the  
276 bootstrap. *Evolution* **39**:783-791.
- 277 14. **Zuckermandl E, Pauling L.** 1965. Evolutionary convergence and divergence  
278 in proteins, p. 97-166. *In* Bryson V, Vogel HJ (ed.), *Evolving Genes and*  
279 *Proteins*. Academic Press, New York.
- 280 15. **Henikoff S, Henikoff JG.** 1992. Amino-acid substitution matrices from  
281 protein blocks. *Proceedings of the National Academy of Sciences of the*  
282 *United States of America* **89**:10915-10919.
- 283 16. **Whelan S, Goldman N.** 2001. A general empirical model of protein evolution  
284 derived from multiple protein families using a maximum-likelihood  
285 approach. *Molecular Biology and Evolution* **18**:691-699.
- 286 17. **Papadopoulos JS, Agarwala R.** 2007. COBALT: constraint-based alignment  
287 tool for multiple protein sequences. *Bioinformatics* **23**:1073-1079.
- 288 18. **Zengel JM, Lindahl L.** 1994. Diverse mechanisms for regulating ribosomal  
289 protein synthesis in *Escherichia coli*, p. 331-370. *In* Cohn WE, Moldave K  
290 (ed.), *Progress in Nucleic Acid Research and Molecular Biology*, vol. 47.
- 291 19. **Korobeinikova AV, Gongadze GM, Korepanov AP, Eliseev BD, Bazhenova**  
292 **MV, Garber MB.** 2008. 5S rRNA-recognition module of CTC family proteins  
293 and its evolution. *Biochemistry-Moscow* **73**:156-163.
- 294 20. **Stöffler G.** 1974. Structure and function of the *Escherichia coli* ribosome:  
295 Immunochemical analysis, p. 615-667. *In* Nomura M, Tissières A, Lengyel P  
296 (ed.), *Ribosomes*. Cold Spring Harbor Laboratory, Cold Spring Harbor, NY.
- 297 21. **Pettersson I, Hardy SJS, Liljas A.** 1976. The ribosomal protein L8 is a  
298 complex of L7/L12 and L10. *FEBS Letters* **64**:135-138.
- 299 22. **Grosjean H, de Crécy-Lagard V, Marck C.** 2010. Deciphering synonymous  
300 codons in the three domains of life: Co-evolution with specific tRNA  
301 modification enzymes. *FEBS Letters* **584**:252-264.
- 302 23. **Tåquist H, Cui Y, Ardell DH.** 2007. TFAM 1.0: an online tRNA function  
303 classifier. *Nucleic Acids Research* **35**:W350-W353.
- 304 24. **Jühling F, Mörl M, Hartmann RK, Sprinzl M, Stadler PF, Pütz J.** 2009.  
305 tRNAdb 2009: compilation of tRNA sequences and tRNA genes. *Nucleic Acids*  
306 *Research* **37**:D159-D162.
- 307 25. **Mußmann M, Hu FZ, Richter M, de Beer D, Preisler A, Jørgensen BB,**  
308 **Huntemann M, Glöckner FO, Amann R, Koopman WJH, Lasken RS, Janto**  
309 **B, Hogg J, Stoodley P, Boissy R, Ehrlich GD.** 2007. Insights into the genome  
310 of large sulfur bacteria revealed by analysis of single filaments. *PLoS Biology*  
311 **5**:1923-1937.
- 312 26. **Mezzino MJ, Strohl WR, Larkin JM.** 1984. Characterization of *Beggiatoa*  
313 *alba*. *Archives of Microbiology* **137**:139-144.
- 314 27. **Aruga S, Kamagata Y, Kohno T, Hanada S, Nakamura K, Kanagawa T.**  
315 2002. Characterization of filamentous Eikelboom type 021N bacteria and  
316 description of *Thiothrix disciformis* sp. nov. and *Thiothrix flexilis* sp. nov.  
317 *International Journal of Systematic and Evolutionary Microbiology* **52**:1309-  
318 1316.

- 319 28. **Nielsen PH, Kragelund C, Seviour RJ, Nielsen JL.** 2009. Identity and  
320 ecophysiology of filamentous bacteria in activated sludge. *FEMS*  
321 *Microbiology Reviews* **33**:969-998.
- 322 29. **Larkin JM, Shinabarger DL.** 1983. Characterization of *Thiothrix nivea*.  
323 *International Journal of Systematic Bacteriology* **33**:841-846.
- 324 30. **Klappenbach JA, Pierson BK.** 2004. Phylogenetic and physiological  
325 characterization of a filamentous anoxygenic photoautotrophic bacterium  
326 '*Candidatus Chlorothrix halophila*' gen. nov., sp. nov., recovered from  
327 hypersaline microbial mats. *Archives of Microbiology* **181**:17-25.
- 328 31. **Sutcliffe IC.** 2010. A phylum level perspective on bacterial cell envelope  
329 architecture. *Trends in Microbiology* **18**:464-470.
- 330 32. **Holt JG, Lewin RA.** 1968. *Herpetosiphon aurantiacus* gen. et sp. n., a new  
331 filamentous gliding organism. *J. Bacteriol.* **95**:2407-2408.
- 332 33. **Keppen OI, Baulina OI, Lysenko AM, Kondrateva EN.** 1993. A new green  
333 bacterium belonging to the Chloroflexaceae family. *Microbiology* **62**:179-  
334 185.
- 335 34. **Klatt CG, Bryant DA, Ward DM.** 2007. Comparative genomics provides  
336 evidence for the 3-hydroxypropionate autotrophic pathway in filamentous  
337 anoxygenic phototrophic bacteria and in hot spring microbial mats.  
338 *Environmental Microbiology* **9**:2067-2078.
- 339 35. **Hanada S, Takaichi S, Matsuura K, Nakamura K.** 2002. *Roseiflexus*  
340 *castenholzii* gen. nov., sp. nov., a thermophilic, filamentous, photosynthetic  
341 bacterium that lacks chlorosomes. *International Journal of Systematic and*  
342 *Evolutionary Microbiology* **52**:187-193.
- 343 36. **Lewin RA, Lounsbery DM.** 1969. Isolation, cultivation and characterization  
344 of flexibacteria. *Journal of General Microbiology* **58**:145-170.
- 345 37. **van Veen WL, van der Kooij D, Geuze ECWA, van der Vlies AW.** 1973.  
346 Investigations on the sheathed bacterium *Haliscomenobacter hydroxsis* gen.  
347 n., sp. n., isolated from activated sludge. *Antonie van Leeuwenhoek* **39**:207-  
348 216.
- 349 38. **Larkin JM, Williams PM.** 1978. *Runella slithyformis* gen. nov., sp. nov., a  
350 curved, nonflexible, pink bacterium. *International Journal of Systematic*  
351 *Bacteriology* **28**:32-36.
- 352 39. **Lail K, Sikorski J, Saunders E, Lapidus A, Del Rio TG, Copeland A, Tice H,**  
353 **Cheng JF, Lucas S, Nolan M, Bruce D, Goodwin L, Pitluck S, Ivanova N,**  
354 **Mavromatis K, Ovchinnikova G, Pati A, Chen A, Palaniappan K, Land M,**  
355 **Hauser L, Chang YJ, Jeffries CD, Chain P, Brettin T, Detter JC, Schütze A,**  
356 **Rohde M, Tindall BJ, Goker M, Bristow J, Eisen JA, Markowitz V,**  
357 **Hugenholz P, Kyrpides NC, Klen HP, Chen F.** 2010. Complete genome  
358 sequence of *Spirosoma linguale* type strain (1<sup>T</sup>). *Standards in Genomic*  
359 *Sciences* **2**:176-185.
- 360 40. **Ten LN, Xu JL, Jin FX, Im WT, Oh HM, Lee ST.** 2009. *Spirosoma panaciterrae*  
361 sp. nov., isolated from soil. *International Journal of Systematic and*  
362 *Evolutionary Microbiology* **59**:331-335.

- 363 41. **Franzmann PD, Skerman VBD.** 1984. *Gemmata obscuriglobus*, a new genus  
364 and species of the budding bacteria. *Antonie van Leeuwenhoek Journal of*  
365 *Microbiology* **50**:261-268.
- 366 42. **Miyashita H, Ikemoto H, Kurano N, Miyachi S, Chihara M.** 2003.  
367 *Acaryochloris marina* gen. et sp. nov. (Cyanobacteria), an oxygenic  
368 photosynthetic prokaryote containing chl *d* as a major pigment. *J. Phycol.*  
369 **39**:1247-1253.
- 370 43. **Leikoski N, Fewer DP, Jokela J, Wahlsten M, Rouhiainen L, Sivonen K.**  
371 2010. Highly diverse cyanobactins in strains of the genus *Anabaena*. *Applied*  
372 *and Environmental Microbiology* **76**:701-709.
- 373 44. **Skill SC, Smith RJ.** 1987. Synchronous akinete germination and heterocyst  
374 differentiation in *Anabaena* PCC 7937 and *Nostoc* PCC 6720. *Journal of*  
375 *General Microbiology* **133**:299-303.
- 376 45. **Janssen PJ, Morin N, Mergeay M, Leroy B, Wattiez R, Vallaeyts T, Waleron**  
377 **K, Waleron M, Wilmotte A, Quillardet P, de Marsac NT, Talla E, Zhang C-**  
378 **C, Leys N.** 2010. Genome sequence of the edible cyanobacterium *Arthrospira*  
379 sp. PCC 8005. *Journal of Bacteriology* **192**:2465-2466.
- 380 46. **Carrieri D, Momot D, Brasg IA, Ananyev G, Lenz O, Bryant DA, Dismukes**  
381 **GC.** 2010. Boosting autofermentation rates and product yields with sodium  
382 stress cycling: application to production of renewable fuels by cyanobacteria.  
383 *Applied and Environmental Microbiology* **76**:6455-6462.
- 384 47. **Cheevadhanarak S, Paithoonrangsarid K, Prommeenate P, Kaewngam**  
385 **W, Musigkain A, Tragoonrung S, Tabata S, Kaneko T, Chaijaruwanich J,**  
386 **Sangsrakru D, Tangphatsornruang S, Chanprasert J, Tongsimas S,**  
387 **Kusonmano K, Jeamton W, Dulsawat S, Klanchui A, Vorapreeda T,**  
388 **Chumchua V, Khannapho C, Thammarongtham C, Plengvidhya V,**  
389 **Subudhi S, Hongsthong A, Ruengjitchatchawalya M, Meechai A,**  
390 **Senachak J, Tanticharoen M.** 2012. Draft genome sequence of *Arthrospira*  
391 *platensis* C1 (PCC9438).
- 392 48. **Fujisawa T, Narikawa R, Okamoto S, Ehira S, Yoshimura H, Suzuki I,**  
393 **Masuda T, Mochimaru M, Takaichi S, Awai K, Sekine M, Horikawa H,**  
394 **Yashiro I, Omata S, Takarada H, Katano Y, Kosugi H, Tanikawa S, Ohmori**  
395 **K, Sato N, Ikeuchi M, Fujita N, Ohmori M.** 2010. Genomic structure of an  
396 economically important cyanobacterium, *Arthrospira (Spirulina) platensis*  
397 NIES-39. *DNA Research* **17**:85-103.
- 398 49. **Webb EA, Ehrenreich IM, Brown SL, Valois FW, Waterbury JB.** 2009.  
399 Phenotypic and genotypic characterization of multiple strains of the  
400 diazotrophic cyanobacterium, *Crocospaera watsonii*, isolated from the open  
401 ocean. *Environmental Microbiology* **11**:338-348.
- 402 50. **Waterbury JB, Willey JM.** 1988. Isolation and growth of marine planktonic  
403 cyanobacteria. *Methods in Enzymology* **167**:100-105.
- 404 51. **Zehr JP, Waterbury JB, Turner PJ, Montoya JP, Omoregie E, Steward GF,**  
405 **Hansen A, Karl DM.** 2001. Unicellular cyanobacteria fix N<sub>2</sub> in the subtropical  
406 North Pacific Ocean. *Nature* **412**:635-638.

- 407 52. **Reddy KJ, Haskell JB, Sherman DM, Sherman LA.** 1993. Unicellular,  
408 aerobic nitrogen-fixing cyanobacteria of the genus *Cyanothece*. J. Bacteriol.  
409 **175**:1284-1292.
- 410 53. **Rippka R, Deruelles J, Waterbury JB, Herdman M, Stanier RY.** 1979.  
411 Generic assignments, strain histories and properties of pure cultures of  
412 cyanobacteria. Journal of General Microbiology **111**:1-61.
- 413 54. **Singh PK.** 1973. Nitrogen fixation by the unicellular blue-green alga  
414 *Aphanothece*. Arch. Mikrobiol. **92**:59-62.
- 415 55. **Huang T-C, Chow T-J.** 1988. Comparative studies of some nitrogen-fixing  
416 unicellular cyanobacteria isolated from rice fields. Journal of General  
417 Microbiology **134**:3089-3097.
- 418 56. **Saker ML, Neilan BA.** 2001. Varied diazotrophies, morphologies, and  
419 toxicities of genetically similar isolates of *Cylindrospermopsis raciborskii*  
420 (Nostocales, Cyanophyceae) from northern Australia. Applied and  
421 Environmental Microbiology **67**:1839-1845.
- 422 57. **Stucken K, John U, Cembella A, Murillo AA, Soto-Liebe K, Fuentes-Valdes  
423 JJ, Friedel M, Plominsky AM, Vasquez M, Glockner G.** 2010. The smallest  
424 known genomes of multicellular and toxic cyanobacteria: comparison,  
425 minimal gene sets for linked traits and the evolutionary implications. PLoS  
426 One **5**:e9235.
- 427 58. **Stal LJ, Krumbein WE.** 1981. Aerobic nitrogen fixation in pure cultures of a  
428 benthic marine *Oscillatoria* (cyanobacteria). FEMS Microbiology Letters  
429 **11**:295-298.
- 430 59. **Kaneko T, Nakajima N, Okamoto S, Suzuki I, Tanabe Y, Tamaoki M,  
431 Nakamura Y, Kasai F, Watanabe A, Kawashima K, Kishida Y, Ono A,  
432 Shimizu Y, Takahashi C, Minami C, Fujishiro T, Kohara M, Katoh M,  
433 Nakazaki N, Nakayama S, Yamada M, Tabatai S, Watanabe MM.** 2007.  
434 Complete genomic structure of the bloom-forming toxic cyanobacterium  
435 *Microcystis aeruginosa* NIES-843. DNA Research **14**:247-256.
- 436 60. **Staal M, Stal LJ, Hekkert ST, Harren FJM.** 2003. Light action spectra of N<sub>2</sub>  
437 fixation by heterocystous cyanobacteria from the Baltic Sea. Journal of  
438 Phycology **39**:668-677.
- 439 61. **Adolph KW, Haselkorn R.** 1971. Isolation and characterization of a virus  
440 infecting the blue-green alga *Nostoc muscorum*. Virology **46**:200-208.
- 441 62. **Ran LA, Larsson J, Vigil-Stenman T, Nylander JAA, Ininbergs K, Zheng  
442 WW, Lapidus A, Lowry S, Haselkorn R, Bergman B.** 2010. Genome erosion  
443 in a nitrogen-fixing vertically transmitted endosymbiotic multicellular  
444 cyanobacterium. PLoS One **5**:e11486.
- 445 63. **Zheng WW, Bergman B, Chen B, Zheng SP, Xiang G, Rasmussen U.** 2009.  
446 Cellular responses in the cyanobacterial symbiont during its vertical transfer  
447 between plant generations in the *Azolla microphylla* symbiosis. New  
448 Phytologist **181**:53-61.
- 449 64. **Stucken K, Murillo AA, Soto-Liebe K, Fuentes-Valdes JJ, Mendez MA,  
450 Vasquez M.** 2009. Toxicity phenotype does not correlate with phylogeny of  
451 *Cylindrospermopsis raciborskii* strains. Systematic and Applied Microbiology  
452 **32**:37-48.

- 453 65. **Bhaya D, Grossman AR, Steunou AS, Khuri N, Cohan FM, Hamamura N,**  
454 **Melendrez MC, Bateson MM, Ward DM, Heidelberg JF.** 2007. Population  
455 level functional diversity in a microbial community revealed by comparative  
456 genomic and metagenomic analyses. *ISME Journal* **1**:703-713.
- 457 66. **Becraft ED, Cohan FM, Kuhl M, Jensen SI, Ward DM.** 2011. Fine-scale  
458 distribution patterns of *Synechococcus* ecological diversity in microbial mats  
459 of Mushroom Spring, Yellowstone National Park. *Applied and Environmental*  
460 *Microbiology* **77**:7689-7697.
- 461 67. **Roberts RJ, Vincze T, Posfai J, Macelis D.** 2010. REBASE - a database for  
462 DNA restriction and modification: enzymes, genes, and genomes. *Nucleic*  
463 *Acids Research* **38**:D234-D236.
- 464 68. **Apweiler R, Martin MJ, O'Donovan C, Magrane M, Alam-Faruque Y,**  
465 **Antunes R, Barrell D, Bely B, Bingley M, Binns D, Bower L, Browne P,**  
466 **Chan WM, Dimmer E, Eberhardt R, Fazzini F, Fedotov A, Foulger R,**  
467 **Garavelli J, Castro LG, Huntley R, Jacobsen J, Kleen M, Laiho K, Legge D,**  
468 **Lin QA, Liu WD, Luo J, Orchard S, Patient S, Pichler K, Poggioli D,**  
469 **Pontikos N, Pruess M, Rosanoff S, Sawford T, Sehra H, Turner E, Corbett**  
470 **M, Donnelly M, van Rensburg P, Xenarios I, Bougueleret L, Auchincloss**  
471 **A, Argoud-Puy G, Axelsen K, Bairoch A, Baratin D, Blatter MC,**  
472 **Boeckmann B, Bolleman J, Bollondi L, Boutet E, Quintaje SB, Breuza L,**  
473 **Bridge A, deCastro E, Coudert E, Cusin I, Doche M, Dornevil D, Duvaud S,**  
474 **Estreicher A, Famiglietti L, Feuermann M, Gehant S, Ferro S, Gasteiger E,**  
475 **Gateau A, Gerritsen V, Gos A, Gruaz-Gumowski N, Hinz U, Hulo C, Hulo N,**  
476 **James J, Jimenez S, Jungo F, Kappler T, Keller G, Lara V, Lemereier P,**  
477 **Lieberherr D, Martin X, Masson P, Moinat M, Morgat A, Paesano S,**  
478 **Pedruzzi I, Pilbout S, Poux S, Pozzato M, Redaschi N, Rivoire C, Roechert**  
479 **B, Schneider M, Sigrist C, Sonesson K, Staehli S, Stanley E, Stutz A,**  
480 **Sundaram S, Tognolli M, Verbregue L, Veuthey AL, Wu CH, Arighi CN,**  
481 **Arminski L, Barker WC, Chen CM, Chen YX, Dubey P, Huang HZ,**  
482 **Mazumder R, McGarvey P, Natale DA, Natarajan TG, Nchoutmboube J,**  
483 **Roberts NV, Suzek BE, Ugochukwu U, Vinayaka CR, Wang QH, Wang YQ,**  
484 **Yeh LS, Zhang JA.** 2011. Ongoing and future developments at the Universal  
485 Protein Resource. *Nucleic Acids Research* **39**:D214-D219.  
486  
487
